# Supplementary material for: Safe Water Access and Associated Factors Among Households in Bunyangabu District-Western Uganda
Source: Research Square preprint supplement (doi:10.21203/rs.3.rs-6242922/v1), 2025-05-07

## Questionnaire

### QUESTIONNAIRE ON SAFE WATER ACCESS AND ASSOCIATED FACTORS AMONG HOUSEHOLDS IN BUNYANGABU DISTRICT

Good morning/ Good afternoon Sir/ madam, I am ..... a student of  
Masters of Science in Public Health, of Mbarara University of science and technology.  
I am carrying out a study titled "Safe water access and associated factors among  
households in Bunyangabu district

I request you to give me the necessary information by answering the following  
questions.

This information will be kept confidential, and results of the study may help  
stakeholders to intervene accordingly. Do you accept to take part in this survey?

Yes ☐ No ☐

If yes proceed with the interview and if no, thank the respondent and proceed to the  
next household.

District ..... County  
..... Sub  
County.....parish.....  
.....

Questionnaire number (Id) .....Date  
.....

#### Instructions

Circle the response or write in the space provided, Be keen to follow the skip patterns  
and Counter check to ensure all the relevant questions are completed

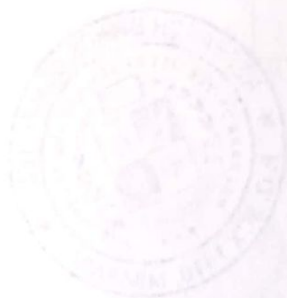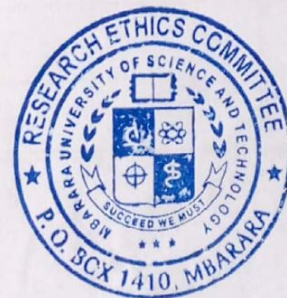

|                                                               |                                                                                                                              |
|---------------------------------------------------------------|------------------------------------------------------------------------------------------------------------------------------|
| Leave blank for REC office only :<br><br><br>MUST-REC stamp : | REC official use only :<br><br>APPROVAL DATE :<br><br>APPROVED CONSENT IRB VERSION NUMBER :<br><br>PI NAME :<br><br>IRB NO : |
|---------------------------------------------------------------|------------------------------------------------------------------------------------------------------------------------------|

| NO                             | QUESTION                 |                    |  | F.O.U.O |
|--------------------------------|--------------------------|--------------------|--|---------|
| <b>SECTION 1: DEMOGRAPHICS</b> |                          |                    |  |         |
| 1                              | How old are you in years | Fill here<br>..... |  |         |
| 2                              | What is your tribe?      | Mutooro            |  |         |
| 3                              |                          | Munyooro           |  |         |
|                                |                          | Mukonzo            |  |         |
|                                |                          | Mukiiga            |  |         |
|                                |                          | Munyankole         |  |         |
|                                |                          | Others specify     |  |         |
| 4                              | What is your religion?   | Anglican           |  |         |
|                                |                          | Catholic           |  |         |
|                                |                          | Moslem             |  |         |
|                                |                          | SDA                |  |         |
|                                |                          | Pentecostal        |  |         |
|                                |                          | Others, specify    |  |         |

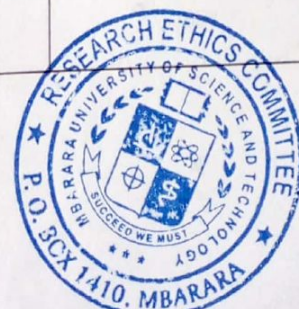

|   |                                                      |                     |  |  |
|---|------------------------------------------------------|---------------------|--|--|
| 5 | What is your marital status                          | Single              |  |  |
|   |                                                      | Married             |  |  |
|   |                                                      | Cohabiting          |  |  |
|   |                                                      | Widowed             |  |  |
|   |                                                      | Divorced/separated  |  |  |
| 6 | 5. What is your highest level of education           | None                |  |  |
|   |                                                      | Primary             |  |  |
|   |                                                      | O-level             |  |  |
|   |                                                      | A – level           |  |  |
|   |                                                      | Tertiary            |  |  |
| 7 | What is the average household income per month?      | Less than 100,000   |  |  |
|   |                                                      | 100,00- 500,000     |  |  |
|   |                                                      | 500,00 – 1,000,000  |  |  |
|   |                                                      | More than 1,000,000 |  |  |
| 8 | Who is the house hold head of this house hold?       | Man                 |  |  |
|   |                                                      | Woman               |  |  |
|   |                                                      | Child               |  |  |
| 9 | What is the education status of the house hold head? | None                |  |  |
|   |                                                      | Primary             |  |  |
|   |                                                      | Secondary           |  |  |

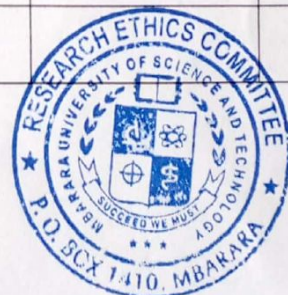



|  |                                                      |                    |  |  |
|--|------------------------------------------------------|--------------------|--|--|
|  |                                                      | Tertiary           |  |  |
|  |                                                      | Others             |  |  |
|  |                                                      | No                 |  |  |
|  | What is the occupation of the head of the household? | Peasant farmer     |  |  |
|  |                                                      | Civil servant      |  |  |
|  |                                                      | Business man/woman |  |  |
|  |                                                      | Un employed        |  |  |
|  |                                                      | Others (specify)   |  |  |

**SAFE WATER ACCESS AMONG HOUSEHOLDS IN BUNYANGABU DISTRICT**

|    |                                                                                                             |                  |     |  |
|----|-------------------------------------------------------------------------------------------------------------|------------------|-----|--|
| 10 | Does this house hold have the following water sources in a distance of less than a kilometer from household | Others           |     |  |
|    |                                                                                                             | no               |     |  |
|    |                                                                                                             | Rain water tank  | Yes |  |
|    |                                                                                                             |                  | No  |  |
|    |                                                                                                             | Piped water      | Yes |  |
|    |                                                                                                             |                  | No  |  |
|    |                                                                                                             | Public water tap | Yes |  |
|    |                                                                                                             |                  | No  |  |
|    |                                                                                                             | Protected well   | Yes |  |
|    |                                                                                                             |                  | No  |  |
|    |                                                                                                             | Bore hole        | Yes |  |
|    |                                                                                                             |                  | No  |  |

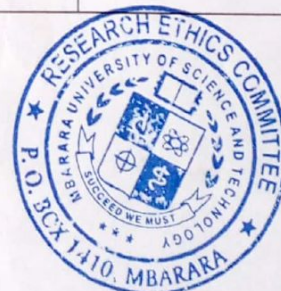

|                                                            |                                                                                                                |                          |     |  |
|------------------------------------------------------------|----------------------------------------------------------------------------------------------------------------|--------------------------|-----|--|
| 11                                                         | <i>What is your household's main source of drinking water during this season?</i>                              | Rain water               | Yes |  |
|                                                            |                                                                                                                |                          | No  |  |
|                                                            |                                                                                                                | Piped water              | Yes |  |
|                                                            |                                                                                                                |                          | No  |  |
|                                                            |                                                                                                                | Public water tap         | Yes |  |
|                                                            |                                                                                                                |                          | No  |  |
|                                                            |                                                                                                                | Protected well           | Yes |  |
|                                                            |                                                                                                                |                          | No  |  |
|                                                            |                                                                                                                | Bore hole                | Yes |  |
|                                                            |                                                                                                                |                          | No  |  |
|                                                            |                                                                                                                | Protected Shallow well   | Yes |  |
|                                                            |                                                                                                                |                          | No  |  |
|                                                            |                                                                                                                | Surface water            | Yes |  |
|                                                            |                                                                                                                |                          | No  |  |
|                                                            |                                                                                                                | Unprotected Shallow well | Yes |  |
|                                                            |                                                                                                                |                          | No  |  |
| 12                                                         | <i>Is water from this source usually accessible every day?</i>                                                 | Yes                      |     |  |
|                                                            |                                                                                                                | No                       |     |  |
| 13                                                         | <i>How long does it usually take you to get to the water source, collect the water and bring it back home?</i> | 30 minutes or less       |     |  |
|                                                            |                                                                                                                | More than 30 minutes     |     |  |
| <b>HOUSEHOLD FACTORS ASSOCIATED WITH SAFE WATER ACCESS</b> |                                                                                                                |                          |     |  |

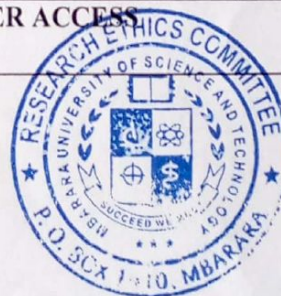

|    |                                                                         |                           |  |  |
|----|-------------------------------------------------------------------------|---------------------------|--|--|
| 14 | What is the size of your household?                                     | Less than 5 people        |  |  |
|    |                                                                         | 5 - 10 people             |  |  |
|    |                                                                         | More than 10 people       |  |  |
| 15 | What is the average age of the members in your household?               | 10 - 20 years             |  |  |
|    |                                                                         | 20 - 30 years             |  |  |
|    |                                                                         | 30 - 40 years             |  |  |
|    |                                                                         | More than 40 years        |  |  |
| 16 | Are there any water storage facilities in your household?               | Yes (Enough)              |  |  |
|    |                                                                         | Yes (but not enough)      |  |  |
|    |                                                                         | Not at all                |  |  |
| 17 | Who usually goes to the water source to fetch water for your household? | Adult woman               |  |  |
|    |                                                                         | Adult man                 |  |  |
|    |                                                                         | Female child (< 15 years) |  |  |
|    |                                                                         | Male child (< 15 years)   |  |  |
|    |                                                                         | Others                    |  |  |
| 18 | How much does your household spend on water-related expenses per month? | Less than 10,000UGX       |  |  |
|    |                                                                         | 10,000 - 20,000UGX        |  |  |
|    |                                                                         | 20,000 - 30,000 UGX       |  |  |
|    |                                                                         | More than 30,000          |  |  |
| 19 | Do you believe the cost of                                              | Yes                       |  |  |

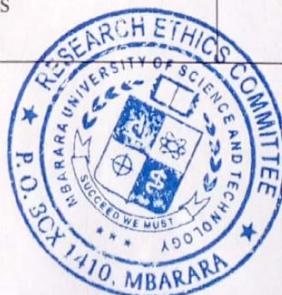



|    |                                                                                                                                  |                                                     |  |  |
|----|----------------------------------------------------------------------------------------------------------------------------------|-----------------------------------------------------|--|--|
|    | accessing water is a significant burden on your household budget?                                                                | No                                                  |  |  |
| 20 | Do you treat your water in any way to make it safer to drink?                                                                    | Yes                                                 |  |  |
|    |                                                                                                                                  | No                                                  |  |  |
| 21 | What do you usually do to the water to make it safer to drink?<br><i>(Anything else?)</i><br><i>(Record all items mentioned)</i> | Boil                                                |  |  |
|    |                                                                                                                                  | Add bleach/chlorine                                 |  |  |
|    |                                                                                                                                  | Strain it through a cloth                           |  |  |
|    |                                                                                                                                  | Use a water filter (ceramic, sand, composite, etc.) |  |  |
|    |                                                                                                                                  | Solar disinfection                                  |  |  |
|    |                                                                                                                                  | Let it stand and settle                             |  |  |
|    |                                                                                                                                  | Other (specify)                                     |  |  |
| 22 | What do you see as the main challenges to accessing safe water in your community?                                                | Inadequate water sources                            |  |  |
|    |                                                                                                                                  | Inadequate yield at the water source                |  |  |
|    |                                                                                                                                  | Bad weather                                         |  |  |

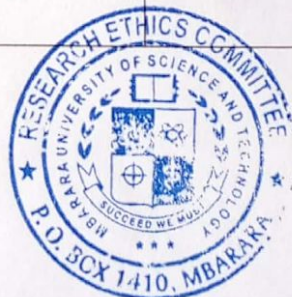

|                                                   |  |                                                       |  |  |
|---------------------------------------------------|--|-------------------------------------------------------|--|--|
|                                                   |  | Poor terrain                                          |  |  |
|                                                   |  | Lack of energetic family members to collect the water |  |  |
|                                                   |  | Lack of money to pay for the water                    |  |  |
| 23                                                |  | Others (specify)                                      |  |  |
| Measures for making water safe at household level |  |                                                       |  |  |

|                                                           |                                                                                                                                          |
|-----------------------------------------------------------|------------------------------------------------------------------------------------------------------------------------------------------|
| Leave blank for REC office only :<br><br>MUST-REC stamp : | REC official use only :<br><br>APPROVAL DATE :<br><br>APPROVED    CONSENT    IRB    VERSION<br>NUMBER :<br><br>PI NAME :<br><br>IRB NO : |
|-----------------------------------------------------------|------------------------------------------------------------------------------------------------------------------------------------------|

|    |                                                                      |                     |  |  |
|----|----------------------------------------------------------------------|---------------------|--|--|
| 24 | What reasons prevent house hold members from boiling drinking water? | Lack of fuel        |  |  |
|    |                                                                      | Lack of knowledge   |  |  |
|    |                                                                      | Lack of time        |  |  |
|    |                                                                      | Negative attitude   |  |  |
|    |                                                                      | Traditional beliefs |  |  |
| 25 | What methods do you consider to                                      | Good storage        |  |  |

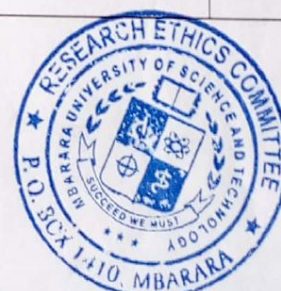



|                                                                                        |                                                               |                                 |  |  |
|----------------------------------------------------------------------------------------|---------------------------------------------------------------|---------------------------------|--|--|
|                                                                                        | make water safe                                               | Filtration                      |  |  |
|                                                                                        |                                                               | Boiling                         |  |  |
|                                                                                        |                                                               | Solar disinfectant              |  |  |
|                                                                                        |                                                               | Apply chemicals                 |  |  |
| 26                                                                                     | Which methods of disinfection do you have in this house hold? | Good storage                    |  |  |
|                                                                                        |                                                               | Filtration                      |  |  |
|                                                                                        |                                                               | Boiling                         |  |  |
|                                                                                        |                                                               | Solar disinfectant              |  |  |
| <b>Level of knowledge on water disinfection and purification among household heads</b> |                                                               |                                 |  |  |
| 27                                                                                     | What is water disinfection                                    | .....                           |  |  |
|                                                                                        |                                                               | .....                           |  |  |
|                                                                                        |                                                               | .....                           |  |  |
|                                                                                        |                                                               | .....                           |  |  |
|                                                                                        |                                                               | .....                           |  |  |
| 28                                                                                     | Which methods of water disinfection do you know               | Storage                         |  |  |
|                                                                                        |                                                               | Boiling                         |  |  |
|                                                                                        |                                                               | Filtration                      |  |  |
|                                                                                        |                                                               | Solar disinfection              |  |  |
|                                                                                        |                                                               | Chlorination                    |  |  |
| 29                                                                                     | How do you keep drinking water safe?                          | Closed container                |  |  |
|                                                                                        |                                                               | Pot                             |  |  |
|                                                                                        |                                                               | Open container                  |  |  |
|                                                                                        |                                                               | Special cups for drinking water |  |  |

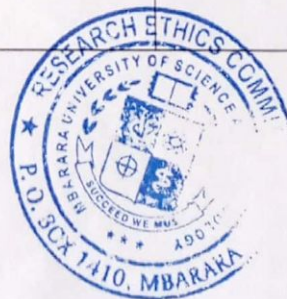

|    |                                                                                                 |                                                   |  |  |
|----|-------------------------------------------------------------------------------------------------|---------------------------------------------------|--|--|
| 30 | What are the effects of drinking unsafe water?                                                  | None                                              |  |  |
|    |                                                                                                 | Skin diseases                                     |  |  |
|    |                                                                                                 | Diarrheal diseases                                |  |  |
|    |                                                                                                 | Bad smell                                         |  |  |
|    |                                                                                                 | Worms                                             |  |  |
| 31 | Does the water source where you collect water have a Water user committee?                      | Yes                                               |  |  |
|    |                                                                                                 | No                                                |  |  |
| 32 | Is the water user committee of your water source functional ?                                   |                                                   |  |  |
|    |                                                                                                 | Yes                                               |  |  |
|    |                                                                                                 | Yes some times                                    |  |  |
|    |                                                                                                 | Not at all                                        |  |  |
| 33 | If no in 19 above, why is your water user committee not functional                              | Members are not given their incentives            |  |  |
|    |                                                                                                 | Members shifted                                   |  |  |
|    |                                                                                                 | Water users refuse to respect the WUCs guidelines |  |  |
|    |                                                                                                 | Others (specify)                                  |  |  |
| 34 | Does the functionality of the water user committees have any effect on the access to safe water | Yes                                               |  |  |
|    |                                                                                                 | No                                                |  |  |

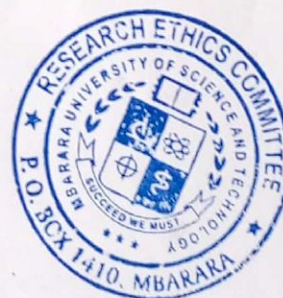

Supplement: Supplementary file 1 [file beb9dd95da549bb887b090d1.pdf]
