# Supplementary material for: Safe Water Access and Associated Factors Among Households in Bunyangabu District-Western Uganda
Source: Research Square preprint supplement (doi:10.21203/rs.3.rs-6242922/v1), 2025-05-07

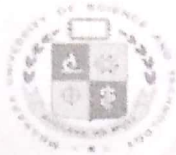

MBARARA UNIVERSITY OF SCIENCE AND TECHNOLOGY

P.O. Box 1410 Mbarara Uganda Tel: +256 465432795 Fax: +256 4654 20762

RESEARCH ETHICS COMMITTEE

E-mail: [sec.rec@must.ac.ug](mailto:sec.rec@must.ac.ug)

22/03/2024

To: John Twasiima

Mbarara University of Science and Technology  
0772606930

Type: Initial Review

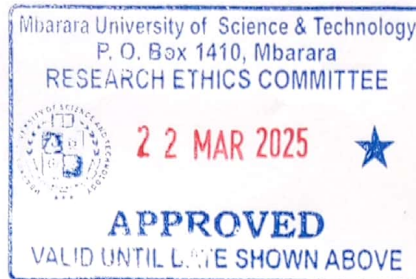

**Re: MUST-2024-1368: SAFE WATER ACCESS AND ASSOCIATED FACTORS AMONG HOUSEHOLDS IN BUNYANGABU DISTRICT**

I am pleased to inform you that at the **165** convened meeting on **29/02/2024**, the MUST Research Ethics Committee meeting voted to approve the above referenced application.

Approval of the research is for the period of **22/03/2024** to **22/03/2025**.

As Principal Investigator of the research, you are responsible for fulfilling the following requirements of approval:

1. All co-investigators must be kept informed of the status of the research.
2. Changes, amendments, and addenda to the protocol or the consent form must be submitted to the REC for re-review and approval **prior** to the activation of the changes.
3. Reports of unanticipated problems involving risks to participants or any new information which could change the risk benefit: ratio must be submitted to the REC.
4. Only approved consent forms are to be used in the enrollment of participants. All consent forms signed by participants and/or witnesses should be retained on file. The REC may conduct audits of all study records, and consent documentation may be part of such audits.
5. Continuing review application must be submitted to the REC **eight weeks** prior to the expiration date of **22/03/2025** in order to continue the study beyond the approved period. Failure to submit a continuing review application in a timely fashion may result in suspension or termination of the study.
6. The REC application number assigned to the research should be cited in any correspondence with the REC of record.
7. You are required to register the research protocol with the Uganda National Council for Science and Technology (UNCST) for final clearance to undertake the study in Uganda.

The following is the list of all documents approved in this application by MUST Research Ethics Committee:

| No. | Document Title                                           | Language | Version Number                                       | Version Date |
|-----|----------------------------------------------------------|----------|------------------------------------------------------|--------------|
| 1   | Protocol                                                 | English  | Version Three -<br>Clean copy of<br>Revised protocol | 2024-03-18   |
| 2   | Community Engagement plan if applicable<br>to your study | English  | one                                                  | 2024-02-04   |
| 3   | Data collection tools                                    | Rutooro  | two                                                  | 2024-02-04   |
| 4   | Informed Consent forms                                   | English  | one                                                  | 2024-02-04   |

Yours Sincerely

*Edith Banda*

Dr. Paul Alele

For: MUST Research Ethics Committee

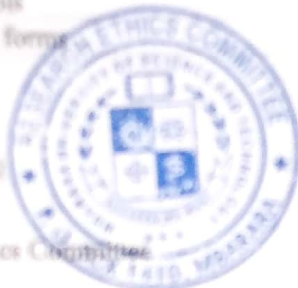

Supplement: Supplementary file 2 [file c1a7380f3092ccf81ec60e6a.pdf]
