# Supplementary material for: Safe Water Access and Associated Factors Among Households in Bunyangabu District-Western Uganda
Source: Research Square preprint supplement (doi:10.21203/rs.3.rs-6242922/v1), 2025-05-07
Supplement: Supplementary file 1 [file f85389981cd7c9e20a4c5a71.xlsx]

## Sheet: SAFE WATER ACCESS AND ASSOCI...
District	County	Sub County	Parish	Village	ID	DODC	Age	Tribe	Religion	Marital status	household income	household cat	occupation of HHH	AWS Rain water	AWS Piped water	AWS Public water tap	AWS Protected well	AWS Bore hole	Main source of drinking water	Other souce of drinking water	main source usually accessible every day	time taken to fetch water	household size	average age of household members	presence of water storage facilities	who fetches water	expenses on water	Burden of water expense	Treat drinking water	method of water treatment	MOWT Boil	MOWT Chlorinate	MOWT Strain it through a cloth	MOWT filter	MOWT Solar disinfection	MOWT Let it stand and settle	MOWT Othermethods	Other MOWT	main challenges to water access	main challenge Inadequate water sources	main challenge Inadequate yield at the water source	main challenge Bad weather	main challenge Poor terrain	main challenge Lack of energetic family members	main challenge Lack of money	main challenge Other	other main challenges to water access	Reason for not boiling drinking water	reasons for not boiling Lack of fuel
Bunyangabu	Bunyangabu	Kyamukube Town Council	Nsuura	Kithoma	224	2024-04-04	42	Mukonzo	SDA	Married	100,00 to 500,000	Man	Peasant farmer	No	No	No	No	No	Surface water		Yes	30 minutes or less	5 - 10 people	10 - 20 years	Yes (Enough)	Adult woman	Less than 10,000UGX	No	Yes	Boil	1	0	0	0	0	0	0		Inadequate water sources Otherchallenges	1	0	0	0	0	0	1	Water not safe	Lack of fuel	1
Bunyangabu	Bunyangabu	Kyamukube Town Council	Nsuura	Kithoma	225	2024-04-04	46	Mukonzo	SDA	Married	Less than 100,000	Man	Peasant farmer	No	No	No	No	No	Surface water		Yes	30 minutes or less	Less than 5 people	20 - 30 years	Yes (but not enough)	Adult woman	Less than 10,000UGX	No	No										Inadequate water sources	1	0	0	0	0	0	0		Lack of fuel	1
Bunyangabu	Bunyangabu	Kyamukube Town Council	Nsuura	Kithoma	226	2024-04-04	27	Mukonzo	Anglican	Married	Less than 100,000	Woman	Peasant farmer	No	No	No	Yes	No	Protected shallow well		Yes	30 minutes or less	5 - 10 people	30 - 40 years	Yes (Enough)	Female child (< 15 years)	Less than 10,000UGX	No	No										Inadequate water sources	0	0	0	0	0	0	1	No challenge	Lack of time	0
Bunyangabu	Bunyangabu	Kyamukube Town Council	Nsuura	Kaisenda	227	2024-04-04	51	Mukonzo	Anglican	Married	100,00 to 500,000	Man	Peasant farmer	No	No	No	Yes	No	Protected shallow well		Yes	30 minutes or less	5 - 10 people	30 - 40 years	Yes (but not enough)	Adult woman	Less than 10,000UGX	No	No										Bad weather	0	0	1	0	0	0	0		Lack of fuel Lack of time	1
Bunyangabu	Bunyangabu	Kyamukube Town Council	Nsuura	Nsuura 2	228	2024-04-04	37	Mukonzo	SDA	Married	100,00 to 500,000	Man	Business man/woman	No	No	No	No	No	Surface water		Yes	More than 30 minutes	Less than 5 people	20 - 30 years	Yes (Enough)	Adult woman	Less than 10,000UGX	No	Yes	Boil	1	0	0	0	0	0	0		Inadequate water sources	1	0	0	0	0	0	0		Lack of fuel Lack of time	1
Bunyangabu	Bunyangabu	Kyamukube Town Council	Nsuura	Nsuura 2	229	2024-04-04	56	Mukonzo	SDA	Married	100,00 to 500,000	Man	Peasant farmer	No	No	No	No	No	Surface water		Yes	More than 30 minutes	5 - 10 people	30 - 40 years	Yes (but not enough)	Adult woman	Less than 10,000UGX	No	Yes	Boil	1	0	0	0	0	0	0		Inadequate water sources	1	0	0	0	0	0	0		Lack of fuel	1
Bunyangabu	Bunyangabu	Kyamukube Town Council	Nsuura	Nsuura 2	230	2024-04-04	60	Mukonzo	Anglican	Married	100,00 to 500,000	Man	Peasant farmer	No	No	No	No	No	Surface water		Yes	More than 30 minutes	5 - 10 people	30 - 40 years	Yes (but not enough)	Adult woman	Less than 10,000UGX	Yes	Yes	Boil	1	0	0	0	0	0	0		Inadequate water sources	1	0	0	0	0	0	0		Lack of time Lack of knowledge	0
Bunyangabu	Bunyangabu	Kyamukube Town Council	Nsuura	Nsuura 2	231	2024-04-04	37	Mukonzo	SDA	Married	Less than 100,000	Man	Peasant farmer	Yes	No	No	No	No	Rain Water Tank		Yes	30 minutes or less	Less than 5 people	20 - 30 years	Yes (but not enough)	Adult woman	Less than 10,000UGX	No	Yes	Boil	1	0	0	0	0	0	0		Inadequate water sources	1	0	0	0	0	0	0		Lack of fuel Lack of time	1
Bunyangabu	Bunyangabu	Kyamukube Town Council	Nsuura	Nsuura 2	232	2024-04-04	49	Mukonzo	Anglican	Married	100,00 to 500,000	Man	Business man/woman	No	No	No	No	No	Surface water		Yes	More than 30 minutes	5 - 10 people	30 - 40 years	Yes (but not enough)	Adult woman	Less than 10,000UGX	Yes	No										Inadequate water sources Poor terrain	1	0	0	1	0	0	0		Lack of fuel Lack of time Lack of knowledge	1
Bunyangabu	Bunyangabu	Kyamukube Town Council	Nsuura	Kaisenda	233	2024-04-04	41	Mukonzo	SDA	Married	100,00 to 500,000	Man	Peasant farmer	No	No	No	Yes	No	Protected shallow well		No	30 minutes or less	Less than 5 people	30 - 40 years	Yes (Enough)	Adult woman	Less than 10,000UGX	No	No										Inadequate yield at the water source	0	1	0	0	0	0	0		Lack of fuel Lack of knowledge Lack of time	1
Bunyangabu	Bunyangabu	Kyamukube Town Council	Nsuura	Kaisenda	234	2024-04-04	35	Mukonzo	SDA	Married	100,00 to 500,000	Man	Peasant farmer	No	No	No	Yes	No	Protected shallow well		Yes	30 minutes or less	Less than 5 people	20 - 30 years	Yes (Enough)	Adult woman	Less than 10,000UGX	No	Yes	Boil	1	0	0	0	0	0	0		Inadequate water sources	1	0	0	0	0	0	0		Lack of fuel Lack of time	1
Bunyangabu	Bunyangabu	Kyamukube Town Council	Nsuura	Bulhambo	235	2024-04-04	43	Mukonzo	SDA	Married	Less than 100,000	Woman	Peasant farmer	No	No	No	No	No	Surface water		Yes	More than 30 minutes	5 - 10 people	30 - 40 years	Yes (but not enough)	Adult woman	Less than 10,000UGX	Yes	No										Inadequate water sources Poor terrain	1	0	0	1	0	0	0		Lack of fuel Lack of time Lack of knowledge Negative attitude	1
Bunyangabu	Bunyangabu	Kyamukube Town Council	Nsuura	Bulhambo	236	2024-04-04	53	Mukonzo	SDA	Married	100,00 to 500,000	Man	Peasant farmer	No	No	No	No	No	Surface water		Yes	More than 30 minutes	5 - 10 people	30 - 40 years	Yes (but not enough)	Adult woman	Less than 10,000UGX	Yes	Yes	Boil	1	0	0	0	0	0	0		Inadequate water sources Poor terrain Lack of energetic family members to collect the water	1	0	0	1	1	0	0		Lack of time Lack of knowledge Lack of fuel	1
Bunyangabu	Bunyangabu	Kyamukube Town Council	Nsuura	Lyamurungu	237	2024-04-04	44	Mukonzo	SDA	Married	100,00 to 500,000	Man	Peasant farmer	No	Yes	Yes	No	No	Public water tap		Yes	30 minutes or less	Less than 5 people	20 - 30 years	Yes (Enough)	Adult woman	Less than 10,000UGX	No	Yes	Boil	1	0	0	0	0	0	0		Poor terrain									Lack of fuel Negative attitude Lack of time Lack of knowledge	1
Bunyangabu	Bunyangabu	Kyamukube Town Council	Nsuura	Lyamurungu	239	2024-04-04	46	Mukonzo	SDA	Married	100,00 to 500,000	Man	Peasant farmer	No	Yes	Yes	No	No	Piped Water		Yes	30 minutes or less	Less than 5 people	30 - 40 years	Yes (but not enough)	Adult woman	Less than 10,000UGX	No	Yes	Boil	1	0	0	0	0	0	0		Inadequate yield at the water source Inadequate water sources	1	1	0	0	0	0	0		Lack of fuel Lack of knowledge Lack of time Negative attitude	1
Bunyangabu	Bunyangabu	Kyamukube Town Council	Nsuura	Kikonzo	340	2024-04-04	49	Mukonzo	Catholic	Married	100,00 to 500,000	Woman	Peasant farmer	No	No	No	Yes	No	Protected shallow well		Yes	More than 30 minutes	5 - 10 people	30 - 40 years	Yes (but not enough)	Adult woman	Less than 10,000UGX	No	Yes	Boil	1	0	0	0	0	0	0		Inadequate water sources Inadequate yield at the water source	1	1	0	0	0	0	0		Lack of time Lack of knowledge Lack of fuel	1
Bunyangabu	Bunyangabu	Kyamukube Town Council	Nsuura	Kibaate	341	2024-04-04	36	Mukonzo	Catholic	Married	100,00 to 500,000	Woman	Peasant farmer	No	No	No	No	No	Protected shallow well	Protected water spring	Yes	More than 30 minutes	5 - 10 people	20 - 30 years	Yes (Enough)	Female child (< 15 years)	Less than 10,000UGX	No	Yes	Boil	1	0	0	0	0	0	0		Inadequate water sources	1	0	0	0	0	0	0		Lack of time	0
Bunyangabu	Bunyangabu	Kyamukube Town Council	Nsuura	Kikonzo	242	2024-04-04	43	Mukonzo	SDA	Married	100,00 to 500,000	Woman	Peasant farmer	No	No	No	Yes	No	Protected shallow well		Yes	More than 30 minutes	Less than 5 people	30 - 40 years	Yes (but not enough)	Female child (< 15 years)	Less than 10,000UGX	Yes	No										Inadequate yield at the water source Inadequate water sources	1	1	0	0	0	0	0		Lack of knowledge Lack of fuel Lack of time	1
Bunyangabu	Bunyangabu	Kyamukube Town Council	Nsuura	Lyamurungu	238	2024-04-04	38	Mukonzo	SDA	Married	100,00 to 500,000	Man	Business man/woman	No	Yes	Yes	No	No	Public water tap		Yes	More than 30 minutes	Less than 5 people	20 - 30 years	Yes (Enough)	Adult woman	Less than 10,000UGX	No	Yes	Let it stand and settle Boil	1	0	0	0	0	1	0		Inadequate yield at the water source	0	1	0	0	0	0	0		Lack of fuel Lack of time	1
Bunyangabu	Bunyangabu	Buheesi Town Council	Kitini	Kikambagya	168	2024-04-04	40	Mukiiga	Anglican	Married	100,00 to 500,000	Woman	Peasant farmer	Yes	Yes	No	Yes	No	Surface water	Protected spring	Yes	30 minutes or less	5 - 10 people	10 - 20 years	Yes (Enough)	Female child (< 15 years)	Less than 10,000UGX	Yes	Yes	Add bleach/chlorine	0	1	0	0	0	0	0		Poor terrain	0	0	0	1	0	0	0		Lack of fuel	1
Bunyangabu	Bunyangabu	Buheesi Town Council	Kitini	Kikambagya	170	2024-04-04	42	Mutooro	Catholic	Widowed	Less than 100,000	Woman	Peasant farmer	No	No	No	No	No	Surface water	Protected spring	Yes	30 minutes or less	5 - 10 people	20 - 30 years	Yes (but not enough)	Adult woman	Less than 10,000UGX	No	Yes	Boil	1	0	0	0	0	0	0		Poor terrain Lack of energetic family members to collect the water	0	0	0	1	1	0	0		Lack of fuel	1
Bunyangabu	Bunyangabu	Buheesi Town Council	Kitini	Kikambagya	171	2024-04-04	35	Mutooro	Catholic	Married	Less than 100,000	Man	Business man/woman	No	No	No	No	No	Surface water	Protected spring	Yes	More than 30 minutes	Less than 5 people	30 - 40 years	Yes (Enough)	Adult woman	Less than 10,000UGX	No	Yes	Boil	1	0	0	0	0	0	0		Poor terrain Inadequate water sources	1	0	0	1	0	0	0		Negative attitude Lack of fuel	1
Bunyangabu	Bunyangabu	Buheesi Town Council	Kitini	Kikambagya	172	2024-04-04	36	Mutooro	Catholic	Married	Less than 100,000	Man	Business man/woman	Yes	Yes	No	Yes	No	Protected shallow well	Protected spring	Yes	More than 30 minutes	5 - 10 people	10 - 20 years	Yes (Enough)	Adult man	Less than 10,000UGX	No	No										Poor terrain	0	0	0	1	0	0	0		Negative attitude Lack of knowledge	0
Bunyangabu	Bunyangabu	Buheesi Town Council	Kitini	Kikambagya	173	2024-04-04	57	Mutooro	Catholic	Divorced	100,00 to 500,000	Woman	Business man/woman	No	No	No	No	No	Surface water	Protected spring	Yes	More than 30 minutes	5 - 10 people	20 - 30 years	Yes (but not enough)	Adult woman	10,000 - 20,000UGX	Yes	No										Lack of energetic family members to collect the water Poor terrain	0	0	0	1	1	0	0		Lack of fuel	1
Bunyangabu	Bunyangabu	Buheesi Town Council	Kitini	Kikambagya	174	2024-04-04	32	Mukiiga	Moslem	Married	Less than 100,000	Man	Peasant farmer	Yes	Yes	No	Yes	No	Protected shallow well	Protected spring	Yes	30 minutes or less	5 - 10 people	10 - 20 years	Yes (Enough)	Adult woman	10,000 - 20,000UGX	Yes	Yes	Boil	1	0	0	0	0	0	0		Lack of energetic family members to collect the water	0	0	0	0	1	0	0		Lack of time	0
Bunyangabu	Bunyangabu	Buheesi Town Council	Kitini	Kikambagya	176	2024-04-04	64	Mutooro	Catholic	Married	Less than 100,000	Man	Peasant farmer	No	No	No	Yes	No	Surface water	Spring	Yes	30 minutes or less	More than 10 people	20 - 30 years	Yes (but not enough)	Female child (< 15 years)	Less than 10,000UGX	No	Yes	Use a water filter	0	0	0	1	0	0	0		Poor terrain	0	0	0	1	0	0	0
Bunyangabu	Bunyangabu	Buheesi Town Council	Kitini	Kitini	177	2024-04-04	10	Mutooro	Anglican	Married	Less than 100,000	Woman	Peasant farmer	No	No	No	No	No	Rain Water Tank		Yes	More than 30 minutes	5 - 10 people	20 - 30 years	Yes (but not enough)	Male child (< 15 years)	Less than 10,000UGX	Yes	Yes	Boil	1	0	0	0	0	0	0		Inadequate water sources	1	0	0	0	0	0	0
Bunyangabu	Bunyangabu	Buheesi Town Council	Kitini	Kitini	180	2024-04-04	75	Mutooro	Catholic	Divorced	Less than 100,000	Woman	Peasant farmer	No	No	No	No	Yes	Bore hole		Yes	30 minutes or less	Less than 5 people	30 - 40 years	Yes (Enough)	Male child (< 15 years)	Less than 10,000UGX	No	Yes	Boil	1	0	0	0	0	0	0		Inadequate water sources	1	0	0	0	0	0	0		Lack of fuel	1
Bunyangabu	Bunyangabu	Buheesi Town Council	Kitini	Kitini	182	2024-04-04	27	Mutooro	Pentecostal	Married	Less than 100,000	Man	Business man/woman	No	No	No	No	Yes	Bore hole		Yes	30 minutes or less	More than 10 people	10 - 20 years	Yes (but not enough)	Adult man	Less than 10,000UGX	No	Yes	Boil	1	0	0	0	0	0	0		Inadequate water sources	1	0	0	0	0	0	0		Lack of fuel	1
Bunyangabu	Bunyangabu	Buheesi Town Council	Kitini	Masika	184	2024-04-04	62	Mutooro	SDA	Single	100,00 to 500,000	Woman	Civil servant	No	Yes	No	No	No	Piped Water		Yes	30 minutes or less	5 - 10 people	10 - 20 years	Yes (Enough)	Adult woman	10,000 - 20,000UGX	Yes	Yes	Boil	1	0	0	0	0	0	0		Inadequate water sources	1	0	0	0	0	0	0		Lack of fuel	1
Bunyangabu	Bunyangabu	Buheesi Town Council	Kitini	Masika	186	2024-04-04	62	Mutooro	Catholic	Widowed	Less than 100,000	Woman	Peasant farmer	No	Yes	No	No	No	Piped Water		Yes	30 minutes or less	5 - 10 people	10 - 20 years	Yes (but not enough)	Adult woman	10,000 - 20,000UGX	Yes	Yes	Boil	1	0	0	0	0	0	0		Inadequate water sources	1	0	0	0	0	0	0		Lack of fuel	1
Bunyangabu	Bunyangabu	Buheesi Town Council	Kitini	Kikambagya	169	2024-04-04	42	Mutooro	Moslem	Married	100,00 to 500,000	Man	Peasant farmer	No	No	No	Yes	No	Surface water	Protected spring	Yes	More than 30 minutes	5 - 10 people	10 - 20 years	Yes (but not enough)	Adult woman	10,000 - 20,000UGX	Yes	Yes	Boil	1	0	0	0	0	0	0		Inadequate water sources Lack of money to pay for the water	1	0	0	0	0	1	0		Lack of fuel	1
Bunyangabu	Bunyangabu	Buheesi Town Council	Kitini	Kikambagya	175	2024-04-04	37	Mutooro	Catholic	Married	100,00 to 500,000	Woman	Peasant farmer	No	No	No	Yes	No	Surface water	Protected spring	Yes	More than 30 minutes	Less than 5 people	10 - 20 years	Yes (Enough)	Adult woman	Less than 10,000UGX	No	Yes	Boil	1	0	0	0	0	0	0		Poor terrain Inadequate water sources	1	0	0	1	0	0	0
Bunyangabu	Bunyangabu	Buheesi Town Council	Kitini	Kitini	178	2024-04-04	28	Mutooro	Anglican	Single	Less than 100,000	Man	Peasant farmer	No	No	No	No	Yes	Bore hole		Yes	30 minutes or less	Less than 5 people	20 - 30 years	Yes (Enough)	Adult man	Less than 10,000UGX	No	Yes	Boil	1	0	0	0	0	0	0		Inadequate water sources									Negative attitude
Bunyangabu	Bunyangabu	Buheesi Town Council	Kitini	Kitini	179	2024-04-04	50	Mutooro	Catholic	Divorced	Less than 100,000	Woman	Peasant farmer	No	No	No	No	Yes	Bore hole		No	30 minutes or less	5 - 10 people	10 - 20 years	Yes (but not enough)	Male child (< 15 years)	Less than 10,000UGX	No	No										Inadequate water sources	1	0	0	0	0	0	0		Lack of fuel	1
Bunyangabu	Bunyangabu	Buheesi Town Council	Kitini	Kitini	181	2024-04-04	23	Munyankole	Pentecostal	Married	Less than 100,000	Man	Business man/woman	No	No	No	No	Yes	Bore hole		No	30 minutes or less	5 - 10 people	10 - 20 years	Yes (but not enough)	Male child (< 15 years)	Less than 10,000UGX	No	Yes	Boil	1	0	0	0	0	0	0		Inadequate water sources	1	0	0	0	0	0	0		Lack of fuel	1
Bunyangabu	Bunyangabu	Buheesi Town Council	Kitini	Kitini	183	2024-04-04	39	Mutooro	Anglican	Married	100,00 to 500,000	Man	Business man/woman	No	No	Yes	No	No	Public water tap		Yes	30 minutes or less	5 - 10 people	10 - 20 years	Yes (Enough)	Adult woman	Less than 10,000UGX	Yes	Yes	Boil	1	0	0	0	0	0	0		Inadequate water sources	1	0	0	0	0	0	0		Lack of fuel	1
Bunyangabu	Bunyangabu	Kibiito	Kasunganyanja	Ntabago B	112	2024-04-04	42	Mutooro	Catholic	Married	100,00 to 500,000	Man	Business man/woman	No	Yes	No	No	No	Piped Water		Yes	30 minutes or less	Less than 5 people	30 - 40 years	Yes (Enough)	Adult woman	Less than 10,000UGX	Yes	Yes	Boil Add bleach/chlorine	1	1	0	0	0	0	0		Inadequate water sources Inadequate yield at the water source	1	1	0	0	0	0	0		Lack of time Lack of fuel	1
Bunyangabu	Bunyangabu	Kibiito	Kasunganyanja	Ntabago B	113	2024-04-04	56	Mutooro	Anglican	Married	100,00 to 500,000	Woman	Peasant farmer	No	Yes	Yes	No	No	Public water tap		Yes	30 minutes or less	5 - 10 people	More than 40 years	Yes (but not enough)	Female child (< 15 years)	Less than 10,000UGX	Yes	Yes	Boil Add bleach/chlorine	1	1	0	0	0	0	0		Inadequate water sources Inadequate yield at the water source Lack of energetic family members to collect the water Lack of money to pay for the water	1	1	0	0	1	1	0		Lack of time Lack of fuel Lack of knowledge	1
Bunyangabu	Bunyangabu	Kibiito	Kasunganyanja	Ntabago A	115	2024-04-04	31	Mutooro	Catholic	Married	Less than 100,000	Woman	Business man/woman	No	Yes	No	No	No	Piped Water		Yes	30 minutes or less	5 - 10 people	30 - 40 years	Yes (Enough)	Adult woman	10,000 - 20,000UGX	Yes	Yes	Boil	1	0	0	0	0	0	0		Otherchallenges Lack of money to pay for the water	0	0	0	0	0	1	1	Water in expansive	Lack of fuel Lack of knowledge Lack of time	1
Bunyangabu	Bunyangabu	Kibiito	Kasunganyanja	Ntabago A	116	2024-04-04	35	Mutooro	Catholic	Single	Less than 100,000	Woman	Peasant farmer	No	Yes	Yes	No	No	Public water tap		No	30 minutes or less	Less than 5 people	20 - 30 years	Yes (but not enough)	Adult woman	Less than 10,000UGX	Yes	No										Lack of money to pay for the water	0	0	0	0	0	1	0		Lack of fuel	1
Bunyangabu	Bunyangabu	Kibiito	Kasunganyanja	Kasenyi	117	2024-04-04	78	Mukiiga	Catholic	Married	Less than 100,000	Man	Peasant farmer	No	No	No	Yes	No	OtherSources	Protected spring	No	More than 30 minutes	Less than 5 people	More than 40 years	Yes (but not enough)	Adult woman	Less than 10,000UGX	Yes	No										Inadequate water sources	1	0	0	0	0	0	0		Lack of fuel Lack of knowledge Lack of time	1
Bunyangabu	Bunyangabu	Kibiito	Kasunganyanja	Kitonzi A	118	2024-04-04	60	Mukiiga	Anglican	Widowed	Less than 100,000	Woman	Peasant farmer	No	Yes	Yes	No	No	Public water tap		No	More than 30 minutes	5 - 10 people	20 - 30 years	Yes (but not enough)	Female child (< 15 years)	Less than 10,000UGX	Yes	Yes	Boil	1	0	0	0	0	0	0		Inadequate water sources	1	0	0	0	0	0	0		Lack of fuel Lack of knowledge Lack of time	1
Bunyangabu	Bunyangabu	Kibiito	Kasunganyanja	Kitonzi A	119	2024-04-04	52	Mukiiga	Anglican	Married	100,00 to 500,000	Man	Peasant farmer	Yes	Yes	Yes	No	No	Rain Water Tank		Yes	30 minutes or less	5 - 10 people	20 - 30 years	Yes (Enough)	Adult woman	Less than 10,000UGX	No	No										Otherchallenges	0	0	0	0	0	0	1	Money to buying water,	Lack of fuel Lack of knowledge Lack of time	1
Bunyangabu	Bunyangabu	Kibiito	Kasunganyanja	Kitonzi A	120	2024-04-04	60	Mukiiga	Anglican	Widowed	100,00 to 500,000	Man	Peasant farmer	Yes	Yes	Yes	No	No	Public water tap		Yes	30 minutes or less	Less than 5 people	30 - 40 years	Yes (but not enough)	Female child (< 15 years)	10,000 - 20,000UGX	Yes	No										Lack of money to pay for the water	0	0	0	0	0	1	0		Lack of fuel Lack of knowledge Negative attitude	1
Bunyangabu	Bunyangabu	Kibiito	Kasunganyanja	Kitonzi A	121	2024-04-04	80	Mukonzo	Anglican	Widowed	Less than 100,000	Woman	Peasant farmer	Yes	Yes	Yes	No	No	Public water tap		Yes	More than 30 minutes	5 - 10 people	30 - 40 years	Yes (but not enough)	Female child (< 15 years)	10,000 - 20,000UGX	Yes	No										Lack of money to pay for the water	0	0	0	0	0	1	0		Lack of fuel Lack of knowledge Lack of time Negative attitude	1
Bunyangabu	Bunyangabu	Kibiito	Kasunganyanja	Kitonzi B	122	2024-04-04	74	Mukiiga	Anglican	Single	Less than 100,000	Man	Peasant farmer	No	Yes	Yes	No	No	Public water tap		Yes	30 minutes or less	Less than 5 people	30 - 40 years	Yes (but not enough)	Adult man	Less than 10,000UGX	Yes	Yes	Boil	1	0	0	0	0	0	0		Lack of money to pay for the water	0	0	0	0	0	1	0		Lack of fuel Lack of knowledge Lack of time Negative attitude Traditional beliefs	1
Bunyangabu	Bunyangabu	Kibiito	Kasunganyanja	Kitonzi B	123	2024-04-04	45	Mukiiga	Anglican	Single	100,00 to 500,000	Woman	Peasant farmer	No	Yes	Yes	No	No	Public water tap		Yes	More than 30 minutes	Less than 5 people	30 - 40 years	Yes (Enough)	Female child (< 15 years)	10,000 - 20,000UGX	Yes	Yes	Boil	1	0	0	0	0	0	0		Lack of money to pay for the water	0	0	0	0	0	1	0		Lack of knowledge Lack of time Lack of fuel Negative attitude Traditional beliefs	1
Bunyangabu	Bunyangabu	Kibiito	Kasunganyanja	Kitonzi B	124	2024-04-04	62	Mukonzo	Anglican	Married	100,00 to 500,000	Man	Peasant farmer	Yes	Yes	Yes	No	No	Public water tap		Yes	More than 30 minutes	Less than 5 people	30 - 40 years	Yes (Enough)	Female child (< 15 years)	Less than 10,000UGX	Yes	No										Lack of money to pay for the water	0	0	0	0	0	1	0		Lack of fuel Lack of knowledge Lack of time Negative attitude	1
Bunyangabu	Bunyangabu	Kibiito	Kasunganyanja	Kitonzi B	125	2024-04-04	40	Mukonzo	Anglican	Married	100,00 to 500,000	Man	Peasant farmer	No	Yes	Yes	No	No	Public water tap		Yes	More than 30 minutes	5 - 10 people	20 - 30 years	Yes (but not enough)	Female child (< 15 years)	10,000 - 20,000UGX	Yes	Yes	Boil	1	0	0	0	0	0	0		Lack of money to pay for the water	0	0	0	0	0	1	0		Lack of fuel Lack of knowledge	1
Bunyangabu	Bunyangabu	Kibiito	Kasunganyanja	Kasenyi	126	2024-04-04	51	Mutooro	Anglican	Married	100,00 to 500,000	Man	Peasant farmer	No	No	No	No	No	Rain Water Tank	Protected spring	Yes	More than 30 minutes	Less than 5 people	30 - 40 years	Yes (but not enough)	Female child (< 15 years)	10,000 - 20,000UGX	No	Yes	Boil	1	0	0	0	0	0	0		Lack of money to pay for the water	0	0	0	0	0	1	0		Lack of fuel Lack of knowledge Negative attitude	1
Bunyangabu	Bunyangabu	Kibiito	Kasunganyanja	Kasenyi	127	2024-04-04	54	Mukonzo	Anglican	Married	100,00 to 500,000	Man	Peasant farmer	Yes	Yes	Yes	No	No	Piped Water		Yes	More than 30 minutes	5 - 10 people	30 - 40 years	Yes (Enough)	Female child (< 15 years)	10,000 - 20,000UGX	Yes	Yes	Boil	1	0	0	0	0	0	0		Lack of money to pay for the water	0	0	0	0	0	1	0		Lack of fuel Lack of knowledge Lack of time Negative attitude Traditional beliefs	1
Bunyangabu	Bunyangabu	Rwimi Subcounty	Kaina	Kaina B	280	2024-04-03	45	Munyankole	Anglican	Married	Less than 100,000	Man	Peasant farmer	No	No	Yes	Yes	No	Public water tap		Yes	30 minutes or less	5 - 10 people	20 - 30 years	Yes (Enough)	Female child (< 15 years)	10,000 - 20,000UGX	Yes	Yes	Boil	1	0	0	0	0	0	0		Lack of money to pay for the water	0	0	0	0	0	1	0		Lack of fuel	1
Bunyangabu	Bunyangabu	Rwimi Subcounty	Kaina	Kaina B	281	2024-04-04	38	Mukiiga	Catholic	Married	100,00 to 500,000	Woman	Peasant farmer	No	Yes	No	Yes	No	Piped Water		Yes	30 minutes or less	Less than 5 people	20 - 30 years	Yes (Enough)	Female child (< 15 years)	Less than 10,000UGX	No	Yes	Boil	1	0	0	0	0	0	0		Inadequate water sources	1	0	0	0	0	0	0		Lack of time	0
Bunyangabu	Bunyangabu	Rwimi Subcounty	Kaina	Kaina A	282	2024-04-04	30	Mutooro	Catholic	Married	Less than 100,000	Woman	Peasant farmer	No	Yes	Yes	Yes	No	Public water tap		Yes	30 minutes or less	Less than 5 people	20 - 30 years	Yes (but not enough)	Adult woman	10,000 - 20,000UGX	Yes	Yes	Boil	1	0	0	0	0	0	0		Inadequate water sources	1	0	0	0	0	0	0		Lack of fuel	1
Bunyangabu	Bunyangabu	Rwimi Subcounty	Kaina	Kaina B	283	2024-04-04	43	Mukiiga	Catholic	Separated	Less than 100,000	Man	Peasant farmer	No	Yes	Yes	Yes	No	Public water tap		Yes	30 minutes or less	Less than 5 people	30 - 40 years	Yes (Enough)	Adult woman	Less than 10,000UGX	Yes	Yes	Boil	1	0	0	0	0	0	0		Inadequate water sources	1	0	0	0	0	0	0		Lack of fuel	1
Bunyangabu	Bunyangabu	Rwimi Subcounty	Kaina	Kaina C	284	2024-04-04	46	Mutooro	Catholic	Married	100,00 to 500,000	Woman	Peasant farmer	No	Yes	Yes	Yes	No	Public water tap		Yes	30 minutes or less	Less than 5 people	20 - 30 years	Yes (Enough)	Adult woman	10,000 - 20,000UGX	No	Yes	Boil	1	0	0	0	0	0	0		Inadequate water sources	1	0	0	0	0	0	0		Lack of fuel	1
Bunyangabu	Bunyangabu	Rwimi Subcounty	Kaina	Kaina A	285	2024-04-04	40	Mukiiga	Catholic	Married	100,00 to 500,000	Man	Peasant farmer	No	Yes	Yes	Yes	No	Public water tap		Yes	30 minutes or less	5 - 10 people	30 - 40 years	Yes (Enough)	Adult woman	10,000 - 20,000UGX	No	Yes	Boil	1	0	0	0	0	0	0		Inadequate water sources	1	0	0	0	0	0	0		Lack of fuel Lack of time	1
Bunyangabu	Bunyangabu	Rwimi Subcounty	Kaina	Kaina A	286	2024-04-04	60	Mukiiga	Anglican	Married	Less than 100,000	Woman	Peasant farmer	No	Yes	Yes	No	No	Public water tap		Yes	30 minutes or less	Less than 5 people	20 - 30 years	Yes (Enough)	Female child (< 15 years)	Less than 10,000UGX	Yes	Yes	Boil	1	0	0	0	0	0	0		Inadequate water sources	1	0	0	0	0	0	0		Lack of fuel	1
Bunyangabu	Bunyangabu	Rwimi Subcounty	Kaina	Kaina A	287	2024-04-04	29	Mutooro	Catholic	Married	100,00 to 500,000	Woman	Business man/woman	No	Yes	Yes	No	No	Public water tap		Yes	30 minutes or less	Less than 5 people	20 - 30 years	Yes (Enough)	Adult woman	Less than 10,000UGX	Yes	Yes	Boil	1	0	0	0	0	0	0		Inadequate water sources	1	0	0	0	0	0	0		Lack of fuel Lack of time	1
Bunyangabu	Bunyangabu	Rwimi Subcounty	Kaina	Kaina A	288	2024-04-04	25	Mukiiga	Catholic	Single	Less than 100,000	Man	Peasant farmer	No	Yes	Yes	No	No	Public water tap		Yes	More than 30 minutes	Less than 5 people	20 - 30 years	Yes (but not enough)	Female child (< 15 years)	Less than 10,000UGX	No	Yes	Boil	1	0	0	0	0	0	0		Inadequate water sources	1	0	0	0	0	0	0		Lack of fuel Lack of time	1
Bunyangabu	Bunyangabu	Rwimi Subcounty	Rweihara	Rweihara A	289	2024-04-05	45	Mukiiga	Anglican	Married	100,00 to 500,000	Man	Peasant farmer	No	Yes	Yes	No	No	Public water tap		Yes	30 minutes or less	Less than 5 people	30 - 40 years	Yes (Enough)	Adult woman	10,000 - 20,000UGX	No	No										Bad weather	0	0	1	0	0	0	0		Lack of knowledge Lack of time	0
Bunyangabu	Bunyangabu	Rwimi Subcounty	Rweihara	Rweihara A	290	2024-04-05	46	Mukiiga	Anglican	Married	Less than 100,000	Man	Peasant farmer	No	No	Yes	No	No	Public water tap		Yes	More than 30 minutes	5 - 10 people	30 - 40 years	Yes (Enough)	Adult man	10,000 - 20,000UGX	No	Yes	Boil	1	0	0	0	0	0	0		Inadequate water sources	1	0	0	0	0	0	0		Lack of fuel Lack of time	1
Bunyangabu	Bunyangabu	Rwimi Subcounty	Rweihara	Rweihara A	291	2024-04-05	82	Mutooro	Catholic	Married	Less than 100,000	Woman	Peasant farmer	No	No	Yes	No	No	Public water tap		Yes	More than 30 minutes	Less than 5 people	20 - 30 years	Yes (but not enough)	Female child (< 15 years)	Less than 10,000UGX	No	No										Inadequate water sources	1	0	0	0	0	0	0		Lack of knowledge Lack of time	0
Bunyangabu	Bunyangabu	Rwimi Subcounty	Rweihara	Rweihara A	292	2024-04-05	47	Mutooro	Catholic	Married	100,00 to 500,000	Man	Peasant farmer	Yes	No	Yes	No	No	Public water tap		Yes	More than 30 minutes	5 - 10 people	30 - 40 years	Yes (Enough)	Female child (< 15 years)	10,000 - 20,000UGX	No	No										Inadequate water sources	1	0	0	0	0	0	0		Lack of fuel Lack of knowledge Lack of time	1
Bunyangabu	Bunyangabu	Rwimi Subcounty	Karambi	Karambi B	293	2024-04-05	20	Mukiiga	Anglican	Married	100,00 to 500,000	Woman	Peasant farmer	No	No	Yes	No	No	Public water tap		No	More than 30 minutes	Less than 5 people	10 - 20 years	Yes (but not enough)	Adult woman	10,000 - 20,000UGX	No	Yes	Boil	1	0	0	0	0	0	0		Inadequate water sources	1	0	0	0	0	0	0		Lack of fuel	1
Bunyangabu	Bunyangabu	Rwimi Subcounty	Karambi	Karambi B	294	2024-04-05	23	Mukiiga	Catholic	Married	100,00 to 500,000	Woman	Peasant farmer	Yes	No	Yes	No	No	Public water tap		No	More than 30 minutes	5 - 10 people	30 - 40 years	Yes (Enough)	Adult woman	Less than 10,000UGX	No	No										Inadequate water sources	1	0	0	0	0	0	0		Lack of fuel Lack of knowledge Lack of time	1
Bunyangabu	Bunyangabu	Rwimi Subcounty	Karambi	Karambi B	295	2024-04-05	65	Mukiiga	Catholic	Widowed	Less than 100,000	Woman	Peasant farmer	No	No	Yes	No	No	Public water tap		No	More than 30 minutes	Less than 5 people	30 - 40 years	Yes (but not enough)	Female child (< 15 years)	Less than 10,000UGX	No	No										Inadequate water sources	1	0	0	0	0	0	0		Lack of fuel Lack of knowledge Lack of time	1
Bunyangabu	Bunyangabu	Rwimi Subcounty	Karambi	Karambi B	296	2024-04-05	21	Mukiiga	Catholic	Married	100,00 to 500,000	Woman	Peasant farmer	Yes	No	Yes	No	No	Public water tap		Yes	More than 30 minutes	Less than 5 people	20 - 30 years	Yes (Enough)	Adult man	10,000 - 20,000UGX	No	No										Inadequate water sources	1	0	0	0	0	0	0		Lack of fuel Lack of knowledge Lack of time	1
Bunyangabu	Bunyangabu	Rwimi Subcounty	Karambi	Karambi B	297	2024-04-05	36	Mukiiga	Anglican	Separated	Less than 100,000	Man	Peasant farmer	No	No	Yes	No	No	Public water tap		Yes	30 minutes or less	Less than 5 people	20 - 30 years	Yes (Enough)	Adult man	Less than 10,000UGX	Yes	No										Inadequate water sources	1	0	0	0	0	0	0		Lack of fuel Lack of knowledge Lack of time	1
Bunyangabu	Bunyangabu	Rwimi Subcounty	Karambi	Karambi B	298	2024-04-05	35	Mukiiga	Catholic	Separated	Less than 100,000	Woman	Business man/woman	No	No	Yes	No	No	Public water tap		No	30 minutes or less	Less than 5 people	20 - 30 years	Yes (Enough)	Adult woman	Less than 10,000UGX	Yes	Yes	Boil	1	0	0	0	0	0	0		Inadequate water sources	1	0	0	0	0	0	0		Lack of fuel	1
Bunyangabu	Bunyangabu	Rwimi Subcounty	Karambi	Karambi A	299	2024-04-05	55	Mukiiga	Anglican	Married	100,00 to 500,000	Man	Peasant farmer	No	No	Yes	No	No	Public water tap		Yes	30 minutes or less	Less than 5 people	20 - 30 years	Yes (Enough)	Female child (< 15 years)	Less than 10,000UGX	Yes	Yes	Boil	1	0	0	0	0	0	0		Inadequate water sources	1	0	0	0	0	0	0		Lack of fuel	1
Bunyangabu	Bunyangabu	Rwimi Subcounty	Karambi	Karambi A	300	2024-04-05	50	Mutooro	Catholic	Married	100,00 to 500,000	Man	Peasant farmer	No	No	Yes	No	No	Public water tap		Yes	30 minutes or less	Less than 5 people	20 - 30 years	Yes (Enough)	Adult woman	Less than 10,000UGX	No	Yes	Boil	1	0	0	0	0	0	0		Inadequate water sources	1	0	0	0	0	0	0		Lack of fuel	1
Bunyangabu	Bunyangabu	Kakinga TC	Kajumiro ward	Kajumiro B	56	2024-04-04	23	Mukiiga	Catholic	Married	Less than 100,000	Man	Peasant farmer	No	No	Yes	Yes	No	Public water tap		Yes	30 minutes or less	Less than 5 people	20 - 30 years	Yes (but not enough)	Adult man	Less than 10,000UGX	No	Yes	Boil	1	0	0	0	0	0	0		Inadequate water sources	1	0	0	0	0	0	0		Otherreasons	0
Bunyangabu	Bunyangabu	Kakinga TC	Kajumiro ward	Kajumiro B	57	2024-04-04	48	Mukiiga	Catholic	Married	Less than 100,000	Man	Peasant farmer	No	No	No	No	Yes	Bore hole		Yes	30 minutes or less	5 - 10 people	30 - 40 years	Yes (Enough)	Adult man	Less than 10,000UGX	Yes	Yes	Boil	1	0	0	0	0	0	0		Inadequate water sources	1	0	0	0	0	0	0		Otherreasons	0
Bunyangabu	Bunyangabu	Kakinga TC	Rubalika Ward	Rubalika 2C	58	2024-04-04	33	Mukiiga	Anglican	Married	100,00 to 500,000	Man	Business man/woman	No	Yes	Yes	No	No	Piped Water		Yes	30 minutes or less	Less than 5 people	30 - 40 years	Yes (Enough)	Adult woman	Less than 10,000UGX	No	Yes	Add bleach/chlorine	0	1	0	0	0	0	0		Lack of money to pay for the water	0	0	0	0	0	1	0		Otherreasons	0
Bunyangabu	Bunyangabu	Rwimi Subcounty	Karambi	Karambi A	301	2024-04-05	38	Mukiiga	Catholic	Separated	Less than 100,000	Woman	Peasant farmer	No	No	Yes	No	No	Public water tap		Yes	30 minutes or less	Less than 5 people	20 - 30 years	Yes (Enough)	Adult woman	Less than 10,000UGX	Yes	Yes	Boil	1	0	0	0	0	0	0		Inadequate water sources	1	0	0	0	0	0	0		Lack of fuel	1
Bunyangabu	Bunyangabu	Rwimi Subcounty	Karambi	Narayana	302	2024-04-05	36	Mukiiga	Catholic	Married	100,00 to 500,000	Man	Peasant farmer	No	No	Yes	No	No	Public water tap		Yes	30 minutes or less	Less than 5 people	20 - 30 years	Yes (but not enough)	Adult woman	Less than 10,000UGX	Yes	Yes	Boil	1	0	0	0	0	0	0		Inadequate water sources	1	0	0	0	0	0	0		Lack of fuel	1
Bunyangabu	Bunyangabu	Rwimi Subcounty	Karambi	Narayana	303	2024-04-05	19	Mutooro	Catholic	Separated	Less than 100,000	Woman	Peasant farmer	No	No	Yes	No	No	Public water tap		Yes	30 minutes or less	Less than 5 people	20 - 30 years	Yes (Enough)	Adult woman	Less than 10,000UGX	Yes	Yes	Boil	1	0	0	0	0	0	0		Inadequate water sources	1	0	0	0	0	0	0		Lack of fuel	1
Bunyangabu	Bunyangabu	Rwimi Subcounty	Karambi	Narayana	304	2024-04-05	85	Mukiiga	Anglican	Married	100,00 to 500,000	Woman	Peasant farmer	No	No	Yes	No	No	Public water tap		Yes	30 minutes or less	Less than 5 people	20 - 30 years	Yes (Enough)	Female child (< 15 years)	Less than 10,000UGX	Yes	Yes	Boil	1	0	0	0	0	0	0		Inadequate water sources	1	0	0	0	0	0	0		Lack of fuel	1
Bunyangabu	Bunyangabu	Kakinga TC Town Council	Rubalika Ward	Rubalika 2C	59	2024-04-04	40	Mukiiga	Catholic	Widowed	100,00 to 500,000	Woman	Peasant farmer	Yes	Yes	No	No	No	Piped Water		Yes	30 minutes or less	Less than 5 people	30 - 40 years	Yes (Enough)	Adult woman	Less than 10,000UGX	No	Yes	Add bleach/chlorine	0	1	0	0	0	0	0		Bad weather	0	0	1	0	0	0	0		Lack of fuel	1
Bunyangabu	Bunyangabu	Rwimi Subcounty	Karambi	Narayana	305	2024-04-05	92	Mukiiga	Anglican	Married	100,00 to 500,000	Man	Peasant farmer	Yes	No	Yes	No	No	Public water tap		Yes	More than 30 minutes	Less than 5 people	20 - 30 years	Yes (Enough)	Adult woman	10,000 - 20,000UGX	Yes	Yes	Boil	1	0	0	0	0	0	0		Inadequate water sources	1	0	0	0	0	0	0		Lack of fuel	1
Bunyangabu	Bunyangabu	Rwimi Subcounty	Karambi	Narayana	306	2024-04-05	38	Mukiiga	Catholic	Married	100,00 to 500,000	Woman	Peasant farmer	No	No	No	Yes	No	Protected shallow well		Yes	30 minutes or less	5 - 10 people	30 - 40 years	Yes (Enough)	Female child (< 15 years)	Less than 10,000UGX	Yes	Yes	Boil	1	0	0	0	0	0	0		Inadequate water sources	1	0	0	0	0	0	0		Lack of fuel	1
Bunyangabu	Bunyangabu	Rwimi Subcounty	Karambi	Narayana	307	2024-04-05	32	Mutooro	Anglican	Married	Less than 100,000	Woman	Peasant farmer	No	No	No	Yes	No	Protected shallow well		Yes	More than 30 minutes	Less than 5 people	20 - 30 years	Yes (Enough)	Adult woman	Less than 10,000UGX	Yes	No										Inadequate water sources	1	0	0	0	0	0	0		Lack of fuel Lack of knowledge Lack of time	1
Bunyangabu	Bunyangabu	Kakinga TC	Kajumiro ward	Sempenda	60	2024-04-04	31	Mukiiga	Pentecostal	Married	Less than 100,000	Man	Peasant farmer	No	No	No	No	Yes	Bore hole		Yes	30 minutes or less	5 - 10 people	20 - 30 years	Yes (but not enough)	Female child (< 15 years)	More than 30,000	Yes	No										Lack of energetic family members to collect the water	0	0	0	0	1	0	0		Otherreasons	0
Bunyangabu	Bunyangabu	Kakinga TC	Rubalika Ward	Rubalika 2C	61	2024-04-04	49	Mukiiga	Anglican	Married	100,00 to 500,000	Man	Peasant farmer	Yes	Yes	No	No	No	Bore hole		Yes	30 minutes or less	More than 10 people	More than 40 years	Yes (Enough)	Adult man	20,000 - 30,000 UGX	No	Yes	Boil	1	0	0	0	0	0	0		Bad weather	0	0	1	0	0	0	0		Lack of fuel	1
Bunyangabu	Bunyangabu	Kakinga TC	Rubalika Ward	Rubalika 2B	62	2024-04-04	52	Mukiiga	Anglican	Married	100,00 to 500,000	Man	Business man/woman	Yes	Yes	Yes	No	No	Public water tap		Yes	30 minutes or less	Less than 5 people	More than 40 years	Yes (Enough)	Adult man	20,000 - 30,000 UGX	No	Yes	Boil	1	0	0	0	0	0	0		Inadequate water sources	1	0	0	0	0	0	0		Lack of time	0
Bunyangabu	Bunyangabu	Kakinga TC	Kakinga Central	Kakinga B	63	2024-04-04	38	Mutooro	Catholic	Married	100,00 to 500,000	Woman	Peasant farmer	No	Yes	No	No	No	Piped Water		No	30 minutes or less	Less than 5 people	30 - 40 years	Yes (but not enough)	Adult woman	Less than 10,000UGX	Yes	Yes	Boil	1	0	0	0	0	0	0		Poor terrain	0	0	0	1	0	0	0		Lack of fuel	1
Bunyangabu	Bunyangabu	Kakinga TC	Kakinga Central	Kakinga B	64	2024-04-04	42	Mukiiga	Anglican	Married	Less than 100,000	Woman	Peasant farmer	No	No	No	Yes	No	Protected shallow well		Yes	More than 30 minutes	Less than 5 people	30 - 40 years	Yes (but not enough)	Adult woman	10,000 - 20,000UGX	Yes	Yes	Boil	1	0	0	0	0	0	0		Bad weather	0	0	1	0	0	0	0		Otherreasons	0
Bunyangabu	Bunyangabu	Kakinga TC	Kajumiro ward	Kajumiro B	64	2024-04-04	39	Mukiiga	Catholic	Married	Less than 100,000	Man	Peasant farmer	No	No	No	Yes	Yes	Bore hole		Yes	More than 30 minutes	5 - 10 people	More than 40 years	Yes (but not enough)	Female child (< 15 years)	Less than 10,000UGX	Yes	Yes	Boil	1	0	0	0	0	0	0		Lack of energetic family members to collect the water Inadequate yield at the water source	0	1	0	0	1	0	0		Otherreasons	0
Bunyangabu	Bunyangabu	Kakinga TC	Kajumiro ward	Kajumiro B	68	2024-04-05	52	Mukiiga	Catholic	Married	Less than 100,000	Man	Peasant farmer	No	No	Yes	No	No	Bore hole		Yes	30 minutes or less	5 - 10 people	More than 40 years	Yes (but not enough)	Male child (< 15 years)	Less than 10,000UGX	No	Yes	Boil	1	0	0	0	0	0	0		Inadequate water sources	1	0	0	0	0	0	0		Otherreasons	0
Bunyangabu	Bunyangabu	Kakinga TC	Kajumiro ward	Kajumiro B	69	2024-04-05	44	Mukiiga	Catholic	Widowed	Less than 100,000	Woman	Peasant farmer	No	No	No	No	Yes	Bore hole		Yes	More than 30 minutes	Less than 5 people	20 - 30 years	Yes (but not enough)	Female child (< 15 years)	Less than 10,000UGX	Yes	No										Lack of energetic family members to collect the water	0	0	0	0	1	0	0		Otherreasons	0
Bunyangabu	Bunyangabu	Kakinga TC	Kakinga Central	Kakinga B	70	2024-04-05	52	Mutooro	Catholic	Married	100,00 to 500,000	Man	Civil servant	No	No	Yes	No	No	Public water tap		Yes	30 minutes or less	Less than 5 people	30 - 40 years	Yes (but not enough)	Adult woman	Less than 10,000UGX	No	Yes	Boil	1	0	0	0	0	0	0		Inadequate water sources	1	0	0	0	0	0	0		Lack of fuel Lack of time	1
Bunyangabu	Bunyangabu	Kakinga TC	Kakinga Central	Kakinga B	71	2024-04-05	53	Mukiiga	SDA	Married	Less than 100,000	Man	Business man/woman	No	Yes	Yes	No	No	Piped Water		No	30 minutes or less	5 - 10 people	20 - 30 years	Yes (but not enough)	Adult woman	10,000 - 20,000UGX	No	No										Inadequate water sources	1	0	0	0	0	0	0		Lack of fuel	1
Bunyangabu	Bunyangabu	Kakinga TC	Kakinga Central	Kakinga B	72	2024-04-05	51	Mukiiga	Catholic	Married	100,00 to 500,000	Man	Peasant farmer	No	Yes	Yes	No	No	Public water tap		Yes	30 minutes or less	5 - 10 people	10 - 20 years	Yes (but not enough)	Adult woman	Less than 10,000UGX	Yes	Yes	Boil	1	0	0	0	0	0	0		Inadequate water sources	1	0	0	0	0	0	0		Otherreasons	0
Bunyangabu	Bunyangabu	Kakinga TC	Kakinga Central	Kakinga B	73	2024-04-05	32	Mukiiga	Catholic	Married	Less than 100,000	Man	Business man/woman	No	Yes	Yes	No	No	Piped Water		No	30 minutes or less	More than 10 people	20 - 30 years	Yes (but not enough)	Adult woman	Less than 10,000UGX	Yes	No										Bad weather	0	0	1	0	0	0	0		Lack of fuel	1
Bunyangabu	Bunyangabu	Kakinga TC	Kakinga Central	Kakinga B	74	2024-04-05	30	Mutooro	Pentecostal	Married	Less than 100,000	Man	Peasant farmer	No	Yes	Yes	No	No	Piped Water		No	30 minutes or less	Less than 5 people	20 - 30 years	Yes (but not enough)	Adult man	Less than 10,000UGX	Yes	No										Lack of energetic family members to collect the water	0	0	0	0	1	0	0		Lack of time	0
Bunyangabu	Bunyangabu	Kakinga TC	Kakinga Central	Kakinga B	75	2024-04-05	38	Munyankole	Moslem	Married	100,00 to 500,000	Woman	Business man/woman	No	Yes	No	No	No	Piped Water		No	30 minutes or less	Less than 5 people	30 - 40 years	Yes (Enough)	Adult woman	10,000 - 20,000UGX	No	Yes	Boil	1	0	0	0	0	0	0		Inadequate water sources	1	0	0	0	0	0	0		Lack of fuel	1
Bunyangabu	Bunyangabu	Kakinga TC	Kakinga Central	Kakinga B	76	2024-04-05	30	Mutooro	Catholic	Married	100,00 to 500,000	Man	Peasant farmer	Yes	No	Yes	No	No	Rain Water Tank		Yes	30 minutes or less	Less than 5 people	30 - 40 years	Yes (Enough)	Adult woman	10,000 - 20,000UGX	Yes	Yes	Boil	1	0	0	0	0	0	0		Inadequate water sources	1	0	0	0	0	0	0		Lack of knowledge Lack of fuel Lack of time	1
Bunyangabu	Bunyangabu	Kakinga TC	Kakinga Central	Kakinga B	77	2024-04-05	28	Mutooro	Moslem	Married	Less than 100,000	Man	Peasant farmer	No	Yes	Yes	No	No	Public water tap		Yes	30 minutes or less	Less than 5 people	20 - 30 years	Yes (but not enough)	Adult woman	Less than 10,000UGX	Yes	No										Inadequate water sources	1	0	0	0	0	0	0		Lack of knowledge Lack of time	0
Bunyangabu	Bunyangabu	Buheesi Town Council	Kitini	Masika	185	2024-04-04	40	Mutooro	Catholic	Married	Less than 100,000	Man	Peasant farmer	No	No	No	Yes	No	Rain Water Tank	Protected spring	Yes	More than 30 minutes	5 - 10 people	10 - 20 years	Yes (but not enough)	Adult woman	Less than 10,000UGX	Yes	No										Inadequate water sources	1	0	0	0	0	0	0		Lack of fuel	1
Bunyangabu	Bunyangabu	Kyamukube Town Council	Kyamukube central	Kyamukube A	243	2024-04-05	54	Mukonzo	SDA	Divorced	Less than 100,000	Woman	Business man/woman	No	No	Yes	No	No	Public water tap		Yes	30 minutes or less	Less than 5 people	30 - 40 years	Yes (Enough)	Adult woman	Less than 10,000UGX	Yes	Yes	Use a water filter Boil	1	0	0	1	0	0	0		Inadequate water sources	1	0	0	0	0	0	0		Lack of fuel	1
Bunyangabu	Bunyangabu	Kyamukube Town Council	Kyamukube central	Kyamukube A	244	2024-04-05	39	Mutooro	Catholic	Married	100,00 to 500,000	Man	Business man/woman	No	Yes	Yes	No	No	Public water tap		Yes	30 minutes or less	5 - 10 people	20 - 30 years	Yes (but not enough)	Adult woman	Less than 10,000UGX	Yes	Yes	Boil	1	0	0	0	0	0	0		Inadequate yield at the water source	0	1	0	0	0	0	0		Lack of time	0
Bunyangabu	Bunyangabu	Kyamukube Town Council	Kyamukube central	Kyamukube A	245	2024-04-05	27	Mukonzo	Catholic	Married	Less than 100,000	Man	Unemployed	No	Yes	Yes	No	No	Public water tap		Yes	30 minutes or less	Less than 5 people	20 - 30 years	Yes (but not enough)	Adult woman	Less than 10,000UGX	Yes	Yes	Let it stand and settle	0	0	0	0	0	1	0		Inadequate water sources	1	0	0	0	0	0	0		Lack of fuel Lack of time	1
Bunyangabu	Bunyangabu	Kyamukube Town Council	Kyamukube central	Kyamukube B	246	2024-04-05	31	Munyankole	Mwikiriza	Married	100,00 to 500,000	Woman	Business man/woman	No	Yes	Yes	No	No	Piped Water		Yes	30 minutes or less	Less than 5 people	20 - 30 years	Yes (Enough)	Adult woman	Less than 10,000UGX	No	Yes	Boil	1	0	0	0	0	0	0		Inadequate water sources	1	0	0	0	0	0	0		Lack of time	0
Bunyangabu	Bunyangabu	Kyamukube Town Council	Kyamukube central	Kyamukube B	247	2024-04-05	32	Mutooro	Anglican	Married	Less than 100,000	Man	Business man/woman	No	No	Yes	No	No	Piped Water		Yes	30 minutes or less	Less than 5 people	20 - 30 years	Yes (Enough)	Adult woman	Less than 10,000UGX	No	No										Inadequate yield at the water source	0	1	0	0	0	0	0		Lack of fuel Lack of knowledge Lack of time	1
Bunyangabu	Bunyangabu	Kyamukube Town Council	Kyamukube central	Kyamukube B	248	2024-04-05	47	Mutooro	Moslem	Married	100,00 to 500,000	Man	Business man/woman	No	Yes	No	No	No	Piped Water		Yes	30 minutes or less	Less than 5 people	30 - 40 years	Yes (but not enough)	Adult woman	Less than 10,000UGX	No	Yes	Boil	1	0	0	0	0	0	0		Inadequate yield at the water source	0	1	0	0	0	0	0		Lack of fuel Lack of time	1
Bunyangabu	Bunyangabu	Kyamukube Town Council	Kyamukube central	Nyamahwa	249	2024-04-05	33	Mukonzo	SDA	Married	100,00 to 500,000	Man	Business man/woman	No	Yes	Yes	No	No	Public water tap		Yes	30 minutes or less	5 - 10 people	20 - 30 years	Yes (Enough)	Adult woman	10,000 - 20,000UGX	Yes	No										Inadequate water sources	1	0	0	0	0	0	0		Lack of fuel Lack of knowledge Lack of time	1
Bunyangabu	Bunyangabu	Kyamukube Town Council	Kyamukube central	Nyahamwa	265	2024-04-05	43	Mukonzo	SDA	Married	Less than 100,000	Man	Peasant farmer	No	Yes	Yes	No	No	Public water tap		Yes	30 minutes or less	Less than 5 people	20 - 30 years	Yes (Enough)	Adult woman	Less than 10,000UGX	Yes	Yes	Boil	1	0	0	0	0	0	0		Inadequate water sources	1	0	0	0	0	0	0		Lack of fuel Lack of knowledge Lack of time	1
Bunyangabu	Bunyangabu	Kyamukube Town Council	Kyamukube central	Nyamahwa	250	2024-04-05	34	Mukonzo	SDA	Married	100,00 to 500,000	Man	Business man/woman	No	Yes	Yes	No	No	Piped Water		Yes	30 minutes or less	Less than 5 people	20 - 30 years	Yes (Enough)	Adult woman	Less than 10,000UGX	No	Yes	Boil	1	0	0	0	0	0	0		Inadequate water sources	1	0	0	0	0	0	0		Lack of fuel Lack of knowledge Lack of time	1
Bunyangabu	Bunyangabu	Kyamukube Town Council	Kyamukube central	Kagera	251	2024-04-05	54	Mutooro	Catholic	Married	100,00 to 500,000	Man	Business man/woman	No	Yes	Yes	No	No	Piped Water		Yes	30 minutes or less	5 - 10 people	30 - 40 years	Yes (Enough)	Adult woman	Less than 10,000UGX	No	Yes	Boil	1	0	0	0	0	0	0		Inadequate yield at the water source	0	1	0	0	0	0	0		Lack of fuel Lack of time Negative attitude	1
Bunyangabu	Bunyangabu	Kyamukube Town Council	Kyamukube central	Kagera	252	2024-04-05	51	Mutooro	Catholic	Married	100,00 to 500,000	Man	Peasant farmer	No	Yes	No	No	No	Piped Water		Yes	30 minutes or less	5 - 10 people	20 - 30 years	Yes (but not enough)	Adult woman	Less than 10,000UGX	No	Yes	Boil	1	0	0	0	0	0	0		Inadequate water sources	1	0	0	0	0	0	0		Lack of fuel	1
Bunyangabu	Bunyangabu	Kyamukube Town Council	Kyamukube central	Kagera	253	2024-04-05	56	Mutooro	Catholic	Married	100,00 to 500,000	Man	Business man/woman	No	Yes	No	No	No	Piped Water		Yes	30 minutes or less	5 - 10 people	30 - 40 years	Yes (Enough)	Adult woman	Less than 10,000UGX	No	Yes	Boil	1	0	0	0	0	0	0		Inadequate yield at the water source	0	1	0	0	0	0	0		Lack of fuel	1
Bunyangabu	Bunyangabu	Kyamukube Town Council	Kyamukube central	Kagera	254	2024-04-05	76	Mukonzo	Catholic	Married	100,00 to 500,000	Woman	Peasant farmer	No	Yes	No	No	No	Piped Water		Yes	30 minutes or less	Less than 5 people	30 - 40 years	Yes (but not enough)	Adult woman	Less than 10,000UGX	Yes	Yes	Boil	1	0	0	0	0	0	0		Inadequate water sources	1	0	0	0	0	0	0		Lack of fuel	1
Bunyangabu	Bunyangabu	Kyamukube Town Council	Kyamukube central	Kahuku	255	2024-04-05	47	Mutooro	Catholic	Married	100,00 to 500,000	Woman	Peasant farmer	No	No	Yes	No	No	Piped Water		Yes	30 minutes or less	Less than 5 people	30 - 40 years	Yes (but not enough)	Adult woman	Less than 10,000UGX	No	Yes	Boil	1	0	0	0	0	0	0		Inadequate water sources	1	0	0	0	0	0	0		Lack of fuel Lack of time	1
Bunyangabu	Bunyangabu	Kyamukube Town Council	Kyamukube central	Kahuku	256	2024-04-05	53	Mutooro	Catholic	Married	100,00 to 500,000	Man	Peasant farmer	No	No	Yes	No	No	Piped Water		Yes	30 minutes or less	5 - 10 people	30 - 40 years	Yes (Enough)	Adult woman	Less than 10,000UGX	Yes	Yes	Boil	1	0	0	0	0	0	0		Inadequate water sources Inadequate yield at the water source	1	1	0	0	0	0	0		Lack of fuel Lack of time	1
Bunyangabu	Bunyangabu	Kyamukube Town Council	Kyamukube central	Kahuku	257	2024-04-05	52	Mutooro	Anglican	Married	100,00 to 500,000	Man	Peasant farmer	No	No	Yes	No	No	Piped Water		No	More than 30 minutes	Less than 5 people	20 - 30 years	Yes (but not enough)	Adult woman	Less than 10,000UGX	Yes	Yes	Boil	1	0	0	0	0	0	0		Inadequate water sources	1	0	0	0	0	0	0		Lack of fuel Lack of knowledge	1
Bunyangabu	Bunyangabu	Kyamukube Town Council	Kyamukube central	Kahuku	258	2024-04-05	47	Mutooro	Anglican	Married	100,00 to 500,000	Man	Peasant farmer	No	No	Yes	No	No	Piped Water		No	30 minutes or less	5 - 10 people	20 - 30 years	Yes (but not enough)	Adult woman	Less than 10,000UGX	No	No										Inadequate yield at the water source	0	1	0	0	0	0	0		Lack of fuel Lack of time	1
Bunyangabu	Bunyangabu	Kyamukube Town Council	Mitandi	Mitandi I	259	2024-04-05	27	Mukonzo	SDA	Married	Less than 100,000	Man	Peasant farmer	Yes	No	No	Yes	No	Protected shallow well		Yes	30 minutes or less	Less than 5 people	20 - 30 years	Yes (but not enough)	Adult woman	Less than 10,000UGX	No	Yes	Boil	1	0	0	0	0	0	0		Inadequate water sources	1	0	0	0	0	0	0		Lack of time	0
Bunyangabu	Bunyangabu	Kyamukube Town Council	Mitandi	Mitandi I	260	2024-04-05	61	Mukonzo	SDA	Divorced	Less than 100,000	Woman	Peasant farmer	No	No	No	Yes	No	Protected shallow well		Yes	30 minutes or less	5 - 10 people	30 - 40 years	Yes (but not enough)	Adult woman	Less than 10,000UGX	No	Yes	Boil	1	0	0	0	0	0	0		Inadequate water sources	1	0	0	0	0	0	0		Lack of fuel Lack of time	1
Bunyangabu	Bunyangabu	Kyamukube Town Council	Mitandi	Mitandi I	261	2024-04-05	44	Mukonzo	SDA	Married	100,00 to 500,000	Man	Peasant farmer	No	Yes	No	No	No	Piped Water		Yes	30 minutes or less	5 - 10 people	30 - 40 years	Yes (but not enough)	Male child (< 15 years)	Less than 10,000UGX	No	Yes	Boil	1	0	0	0	0	0	0		Poor terrain	0	0	0	1	0	0	0		Lack of time Lack of fuel Lack of knowledge	1
Bunyangabu	Bunyangabu	Kyamukube Town Council	Mitandi	Mitandi I	262	2024-04-05	37	Mukonzo	SDA	Married	100,00 to 500,000	Man	Peasant farmer	No	No	Yes	No	No	Piped Water		Yes	More than 30 minutes	Less than 5 people	20 - 30 years	Yes (Enough)	Adult woman	Less than 10,000UGX	No	Yes	Boil	1	0	0	0	0	0	0		Poor terrain Inadequate water sources	1	0	0	1	0	0	0		Lack of fuel Lack of knowledge Lack of time	1
Bunyangabu	Bunyangabu	Kyamukube Town Council	Mitandi	Mitandi I	263	2024-04-05	23	Mukonzo	SDA	Married	Less than 100,000	Man	Peasant farmer	No	No	No	Yes	No	Protected shallow well		Yes	More than 30 minutes	Less than 5 people	10 - 20 years	Yes (but not enough)	Adult woman	Less than 10,000UGX	Yes	No										Inadequate yield at the water source	0	1	0	0	0	0	0		Lack of fuel Lack of time Negative attitude Lack of knowledge	1
Bunyangabu	Bunyangabu	Kyamukube Town Council	Mitandi	Mabwe	264	2024-04-05	49	Mukonzo	SDA	Married	100,00 to 500,000	Woman	Business man/woman	No	Yes	No	No	No	Piped Water		Yes	30 minutes or less	5 - 10 people	20 - 30 years	Yes (Enough)	Adult woman	Less than 10,000UGX	No	Yes	Boil Let it stand and settle	1	0	0	0	0	1	0		Inadequate yield at the water source	0	1	0	0	0	0	0		Lack of fuel Lack of time Lack of knowledge Negative attitude	1
Bunyangabu	Bunyangabu	Kibiito	Kabale	Mugoma B	128	2024-04-05	51	Mukiiga	Catholic	Married	100,00 to 500,000	Man	Peasant farmer	No	Yes	Yes	No	No	Public water tap		Yes	30 minutes or less	5 - 10 people	20 - 30 years	Yes (but not enough)	Female child (< 15 years)	10,000 - 20,000UGX	Yes	No										Lack of money to pay for the water	0	0	0	0	0	1	0		Lack of fuel Lack of knowledge Negative attitude	1
Bunyangabu	Bunyangabu	Kibiito	Kabale	Mugoma B	129	2024-04-05	90	Mukiiga	Catholic	Single	Less than 100,000	Woman	Peasant farmer	No	No	No	Yes	No	Protected shallow well		Yes	More than 30 minutes	5 - 10 people	30 - 40 years	Yes (but not enough)	Adult woman	Less than 10,000UGX	No	Yes	Boil	1	0	0	0	0	0	0		Inadequate water sources	1	0	0	0	0	0	0		Lack of fuel Negative attitude	1
Bunyangabu	Bunyangabu	Kibiito	Kabale	Mugoma A	131	2024-04-05	27	Mutooro	Pentecostal	Single	100,00 to 500,000	Man	Peasant farmer	No	No	No	Yes	No	Protected shallow well		Yes	More than 30 minutes	Less than 5 people	10 - 20 years	Yes (but not enough)	Adult woman	Less than 10,000UGX	No	No										Inadequate yield at the water source	0	1	0	0	0	0	0		Lack of fuel Negative attitude	1
Bunyangabu	Bunyangabu	Kibiito	Kabale	Mugoma A	132	2024-04-05	82	Mukiiga	Anglican	Single	Less than 100,000	Woman	Peasant farmer	No	Yes	Yes	No	No	Public water tap		Yes	30 minutes or less	5 - 10 people	More than 40 years	Yes (but not enough)	Adult woman	20,000 - 30,000 UGX	Yes	Yes	Boil	1	0	0	0	0	0	0		Inadequate water sources	1	0	0	0	0	0	0		Lack of fuel Negative attitude	1
Bunyangabu	Bunyangabu	Kibiito	Kabale	Mugoma A	133	2024-04-05	62	Mukiiga	Anglican	Married	100,00 to 500,000	Man	Peasant farmer	Yes	Yes	No	No	No	Piped Water		Yes	30 minutes or less	5 - 10 people	20 - 30 years	Yes (Enough)	Female child (< 15 years)	20,000 - 30,000 UGX	Yes	Yes	Boil	1	0	0	0	0	0	0		Inadequate yield at the water source	0	1	0	0	0	0	0		Lack of fuel	1
Bunyangabu	Bunyangabu	Kibiito	Kabale	Mugoma C	134	2024-04-05	67	Mukiiga	Anglican	Married	100,00 to 500,000	Woman	Peasant farmer	Yes	Yes	Yes	No	No	Public water tap		Yes	More than 30 minutes	5 - 10 people	20 - 30 years	Yes (Enough)	Adult woman	10,000 - 20,000UGX	Yes	Yes	Boil	1	0	0	0	0	0	0		Inadequate yield at the water source	0	1	0	0	0	0	0		Lack of fuel Lack of time	1
Bunyangabu	Bunyangabu	Kibiito	Kabale	Mugoma C	135	2024-04-05	60	Mukiiga	Catholic	Married	Less than 100,000	Woman	Peasant farmer	No	Yes	Yes	No	No	Piped Water		Yes	More than 30 minutes	5 - 10 people	30 - 40 years	Yes (but not enough)	Female child (< 15 years)	10,000 - 20,000UGX	Yes	Yes	Boil	1	0	0	0	0	0	0		Inadequate yield at the water source	0	1	0	0	0	0	0		Lack of time Negative attitude	0
Bunyangabu	Bunyangabu	Kibiito	Kabale	Rwenkuba	137	2024-04-05	65	Mukiiga	Catholic	Single	Less than 100,000	Woman	Peasant farmer	No	Yes	Yes	No	No	Public water tap		Yes	More than 30 minutes	Less than 5 people	20 - 30 years	Yes (but not enough)	Adult woman	10,000 - 20,000UGX	Yes	No										Inadequate water sources	1	0	0	0	0	0	0		Lack of fuel Lack of time	1
Bunyangabu	Bunyangabu	Kibiito	Kabale	Rwenkuba	138	2024-04-05	42	Mutooro	Catholic	Widowed	Less than 100,000	Woman	Peasant farmer	No	Yes	Yes	No	No	Public water tap		Yes	More than 30 minutes	Less than 5 people	10 - 20 years	Yes (but not enough)	Adult woman	10,000 - 20,000UGX	Yes	No										Inadequate water sources	1	0	0	0	0	0	0		Lack of fuel Lack of time	1
Bunyangabu	Bunyangabu	Kibiito	Kabale	Rwenkuba	139	2024-04-05	45	Mukiiga	Catholic	Married	Less than 100,000	Woman	Peasant farmer	No	Yes	Yes	No	No	Public water tap		Yes	30 minutes or less	5 - 10 people	20 - 30 years	Yes (but not enough)	Adult woman	10,000 - 20,000UGX	Yes	No										Inadequate water sources	1	0	0	0	0	0	0		Lack of fuel	1
Bunyangabu	Bunyangabu	Kibiito	Kabale	Mugoma B	130	2024-04-05	58	Mukiiga	Catholic	Married	100,00 to 500,000	Man	Peasant farmer	No	No	No	Yes	No	Protected shallow well		Yes	More than 30 minutes	5 - 10 people	30 - 40 years	Yes (but not enough)	Adult woman	Less than 10,000UGX	No	No										Inadequate water sources	1	0	0	0	0	0	0		Lack of fuel Lack of time Negative attitude Traditional beliefs	1
Bunyangabu	Bunyangabu	Kibiito	Kabale	Rwenkuba	136	2024-04-05	39	Mukiiga	Anglican	Married	500,00 to 1,000,000	Man	Peasant farmer	Yes	Yes	Yes	Yes	Yes	Rain Water Tank		Yes	30 minutes or less	Less than 5 people	20 - 30 years	Yes (Enough)	Adult woman	Less than 10,000UGX	No	Yes	Boil	1	0	0	0	0	0	0		Inadequate yield at the water source	0	1	0	0	0	0	0		Lack of fuel Lack of time Negative attitude Traditional beliefs	1
Bunyangabu	Bunyangabu	Kibiito	Kabale	Rwenkuba	140	2024-04-05	42	Mutooro	Catholic	Married	Less than 100,000	Woman	Peasant farmer	Yes	Yes	Yes	No	No	Public water tap		Yes	30 minutes or less	5 - 10 people	20 - 30 years	Yes (but not enough)	Adult woman	10,000 - 20,000UGX	Yes	No										Lack of money to pay for the water	0	0	0	0	0	1	0		Lack of fuel Negative attitude	1
Bunyangabu	Bunyangabu	Kibiito	Kabale	Nyabusese	141	2024-04-05	20	Mutooro	Catholic	Married	Less than 100,000	Man	Peasant farmer	No	Yes	Yes	No	No	Public water tap		Yes	More than 30 minutes	Less than 5 people	10 - 20 years	Yes (but not enough)	Adult woman	10,000 - 20,000UGX	Yes	No										Lack of money to pay for the water	0	0	0	0	0	1	0		Lack of fuel Lack of time Negative attitude	1
Bunyangabu	Bunyangabu	Kibiito	Kabale	Nyabusese	142	2024-04-05	19	Mukonzo	Pentecostal	Married	Less than 100,000	Man	Business man/woman	No	Yes	Yes	No	No	Public water tap		Yes	More than 30 minutes	Less than 5 people	10 - 20 years	Yes (but not enough)	Adult woman	10,000 - 20,000UGX	Yes	No										Lack of money to pay for the water	0	0	0	0	0	1	0		Lack of fuel Traditional beliefs	1
Bunyangabu	Bunyangabu	Kibiito	Kabale	Nyabusese	142	2024-04-05	45	Mutooro	Anglican	Married	100,00 to 500,000	Woman	Business man/woman	No	No	No	Yes	No	Protected shallow well		Yes	More than 30 minutes	Less than 5 people	20 - 30 years	Yes (but not enough)	Adult woman	Less than 10,000UGX	No	No										Lack of money to pay for the water	0	0	0	0	0	1	0		Lack of fuel Lack of time	1
Bunyangabu	Bunyangabu	Kibiito	Kabale	Bugungu	143	2024-04-05	54	Mukiiga	Anglican	Married	100,00 to 500,000	Man	Peasant farmer	No	No	No	Yes	No	Protected shallow well		Yes	More than 30 minutes	5 - 10 people	20 - 30 years	Yes (but not enough)	Adult man	Less than 10,000UGX	No	Yes	Add bleach/chlorine	0	1	0	0	0	0	0		Inadequate water sources	1	0	0	0	0	0	0		Lack of fuel Lack of knowledge	1
Bunyangabu	Bunyangabu	Kibiito	Kabale	Bugungu	144	2024-04-05	74	Mukiiga	Anglican	Single	Less than 100,000	Woman	Peasant farmer	No	No	No	Yes	No	Protected shallow well		Yes	More than 30 minutes	Less than 5 people	30 - 40 years	Yes (but not enough)	Adult woman	Less than 10,000UGX	No	No										Lack of money to pay for the water	0	0	0	0	0	1	0		Lack of fuel Lack of time	1
Bunyangabu	Bunyangabu	Kibiito	Kabale	Bugungu	145	2024-04-05	44	Mutooro	Catholic	Single	Less than 100,000	Woman	Peasant farmer	No	No	No	Yes	No	Protected shallow well		Yes	More than 30 minutes	Less than 5 people	20 - 30 years	Yes (but not enough)	Adult woman	Less than 10,000UGX	No	No										Lack of energetic family members to collect the water	0	0	0	0	1	0	0		Lack of fuel Negative attitude	1
Bunyangabu	Bunyangabu	Kibiito	Kabale	Kanyalango A	146	2024-04-05	25	Mutooro	Moslem	Married	100,00 to 500,000	Man	Business man/woman	No	Yes	Yes	No	No	Public water tap		Yes	More than 30 minutes	Less than 5 people	10 - 20 years	Yes (but not enough)	Adult woman	10,000 - 20,000UGX	Yes	Yes	Boil	1	0	0	0	0	0	0		Inadequate water sources	1	0	0	0	0	0	0		Lack of fuel Lack of time	1
Bunyangabu	Bunyangabu	Kibiito	Kabale	Kanyalango A	147	2024-04-05	52	Mutooro	Anglican	Single	100,00 to 500,000	Woman	Peasant farmer	No	Yes	Yes	No	No	Public water tap		Yes	More than 30 minutes	Less than 5 people	30 - 40 years	Yes (but not enough)	Adult woman	10,000 - 20,000UGX	Yes	No										Lack of money to pay for the water	0	0	0	0	0	1	0		Lack of fuel Lack of time Negative attitude	1
Bunyangabu	Bunyangabu	Kibiito	Kabale	Kanyalango A	148	2024-04-05	35	Mutooro	Anglican	Married	Less than 100,000	Man	Peasant farmer	No	Yes	Yes	No	No	Public water tap		Yes	More than 30 minutes	Less than 5 people	20 - 30 years	Yes (but not enough)	Adult woman	10,000 - 20,000UGX	Yes	Yes	Boil	1	0	0	0	0	0	0		Lack of money to pay for the water	0	0	0	0	0	1	0		Lack of fuel Lack of knowledge	1
Bunyangabu	Bunyangabu	Buheesi Town Council	Rwensenene	Nyakagongo	187	2024-04-05	48	Mutooro	Catholic	Single	Less than 100,000	Woman	Peasant farmer	No	No	Yes	No	No	Public water tap		No	30 minutes or less	Less than 5 people	10 - 20 years	Yes (Enough)	Adult woman	20,000 - 30,000 UGX	Yes	Yes	Boil	1	0	0	0	0	0	0		Inadequate yield at the water source Inadequate water sources	1	1	0	0	0	0	0		Lack of fuel	1
Bunyangabu	Bunyangabu	Buheesi Town Council	Rwensenene	Nyakagongo	188	2024-04-05	43	Mutooro	Catholic	Married	Less than 100,000	Man	Peasant farmer	No	No	Yes	No	No	Public water tap		No	30 minutes or less	5 - 10 people	10 - 20 years	Yes (Enough)	Female child (< 15 years)	10,000 - 20,000UGX	Yes	No										Otherchallenges	0	0	0	0	0	0	1	Service provider supplies dirty water	Negative attitude	0
Bunyangabu	Bunyangabu	Buheesi Town Council	Rwensenene	Nyakagongo	189	2024-04-05	23	Mutooro	Catholic	Married	Less than 100,000	Man	Business man/woman	No	Yes	No	Yes	No	Protected shallow well	Shallow well	Yes	30 minutes or less	5 - 10 people	10 - 20 years	Yes (Enough)	Adult man	10,000 - 20,000UGX	No	No										Otherchallenges	0	0	0	0	0	0	1	When there no water in the tap, some community members resort to using River Mahoma	Lack of knowledge	0
Bunyangabu	Bunyangabu	Buheesi Town Council	Rwensenene	Nyakagongo	190	2024-04-05	23	Mutooro	Catholic	Married	100,00 to 500,000	Man	Peasant farmer	Yes	No	No	No	No	Surface water	River Mahoma	Yes	30 minutes or less	5 - 10 people	10 - 20 years	Yes (but not enough)	Adult woman	Less than 10,000UGX	No	Yes	Boil	1	0	0	0	0	0	0		Inadequate water sources	1	0	0	0	0	0	0
Bunyangabu	Bunyangabu	Buheesi Town Council	Rwensenene	Nyakagongo	191	2024-04-05	22	Munyankole	Catholic	Married	100,00 to 500,000	Woman	Peasant farmer	Yes	Yes	No	No	No	Piped Water		No	30 minutes or less	5 - 10 people	20 - 30 years	Yes (but not enough)	Female child (< 15 years)	Less than 10,000UGX	No	Yes	Boil	1	0	0	0	0	0	0		Otherchallenges	0	0	0	0	0	0	1	Point water source is far
Bunyangabu	Bunyangabu	Buheesi Town Council	Rwensenene	Nyakagongo	192	2024-04-05	100	Munyankole	Anglican	Widowed	Less than 100,000	Woman	Peasant farmer	No	Yes	Yes	No	No	Piped Water		No	30 minutes or less	5 - 10 people	10 - 20 years	Yes (but not enough)	Female child (< 15 years)	10,000 - 20,000UGX	Yes	No										Otherchallenges	0	0	0	0	0	0	1	Mo nearby point source	Lack of fuel	1
Bunyangabu	Bunyangabu	Buheesi Town Council	Rwensenene	Nyakagongo	193	2024-04-05	77	Mutooro	Catholic	Divorced	Less than 100,000	Woman	Peasant farmer	No	Yes	No	No	No	Piped Water		Yes	30 minutes or less	Less than 5 people	30 - 40 years	Yes (but not enough)	Adult man	Less than 10,000UGX	No	Yes	Boil	1	0	0	0	0	0	0		Otherchallenges	0	0	0	0	0	0	1	Point water is far
Bunyangabu	Bunyangabu	Buheesi Town Council	Rwensenene	Nyakagongo	194	2024-04-05	48	Mutooro	Catholic	Married	Less than 100,000	Man	Peasant farmer	Yes	Yes	No	No	No	Piped Water		Yes	30 minutes or less	5 - 10 people	20 - 30 years	Yes (Enough)	Adult woman	10,000 - 20,000UGX	Yes	Yes	Boil	1	0	0	0	0	0	0		Lack of money to pay for the water	0	0	0	0	0	1	0
Bunyangabu	Bunyangabu	Buheesi Town Council	Rwensenene	Kyekumburwa A	195	2024-04-05	66	Mutooro	Catholic	Divorced	Less than 100,000	Woman	Business man/woman	Yes	Yes	No	No	No	Piped Water		No	30 minutes or less	5 - 10 people	10 - 20 years	Yes (but not enough)	Adult woman	10,000 - 20,000UGX	Yes	Yes	Boil	1	0	0	0	0	0	0		Lack of money to pay for the water	0	0	0	0	0	1	0
Bunyangabu	Bunyangabu	Buheesi Town Council	Bukiika	Kyekumburwa A	196	2024-04-05	60	Mutooro	Catholic	Widowed	Less than 100,000	Woman	Peasant farmer	No	No	Yes	No	No	Piped Water		No	More than 30 minutes	Less than 5 people	More than 40 years	Yes (but not enough)	Female child (< 15 years)	Less than 10,000UGX	Yes	Yes	Let it stand and settle	0	0	0	0	0	1	0		Inadequate water sources	1	0	0	0	0	0	0		Negative attitude	0
Bunyangabu	Bunyangabu	Buheesi Town Council	Rwensenene	Kigarama	197	2024-04-05	62	Mutooro	Catholic	Married	Less than 100,000	Man	Peasant farmer	Yes	Yes	No	No	No	Piped Water		No	30 minutes or less	5 - 10 people	20 - 30 years	Yes (Enough)	Adult woman	10,000 - 20,000UGX	Yes	Yes	Boil	1	0	0	0	0	0	0		Inadequate yield at the water source Inadequate water sources	1	1	0	0	0	0	0
Bunyangabu	Bunyangabu	Buheesi Town Council	Rwensenene	Kigarama	198	2024-04-05	80	Mutooro	Catholic	Widowed	Less than 100,000	Woman	Peasant farmer	Yes	Yes	No	No	No	Piped Water		No	30 minutes or less	5 - 10 people	20 - 30 years	Yes (Enough)	Adult woman	More than 30,000	Yes	Yes	Boil	1	0	0	0	0	0	0
Bunyangabu	Bunyangabu	Buheesi Town Council	Rwensenene	Kigarama	199	2024-04-05	85	Mutooro	Pentecostal	Married	Less than 100,000	Man	Peasant farmer	No	Yes	No	No	No	Piped Water		No	30 minutes or less	5 - 10 people	20 - 30 years	Yes (but not enough)	Adult woman	Less than 10,000UGX	No	Yes	Boil	1	0	0	0	0	0	0
Bunyangabu	Bunyangabu	Buheesi Town Council	Rwensenene	Kigarama	200	2024-04-05	66	Mutooro	Anglican	Divorced	Less than 100,000	Woman	Unemployed	No	Yes	No	No	No	Piped Water		No	30 minutes or less	5 - 10 people	20 - 30 years	Yes (but not enough)	Adult woman	10,000 - 20,000UGX	Yes	Yes	Boil	1	0	0	0	0	0	0
Bunyangabu	Bunyangabu	Buheesi Town Council	Rwensenene	Ibaale	201	2024-04-05	43	Mutooro	Catholic	Single	Less than 100,000	Woman	Business man/woman	No	Yes	No	No	No	Piped Water		No	30 minutes or less	Less than 5 people	10 - 20 years	Yes (but not enough)	Adult woman	10,000 - 20,000UGX	Yes	Yes	Boil	1	0	0	0	0	0	0		Inadequate water sources	1	0	0	0	0	0	0
Bunyangabu	Bunyangabu	Buheesi Town Council	Rwensenene	Ibaale	202	2024-04-05	27	Mutooro	Catholic	Married	100,00 to 500,000	Man	Peasant farmer	No	Yes	No	No	No	Piped Water		Yes	30 minutes or less	Less than 5 people	10 - 20 years	Yes (but not enough)	Adult woman	20,000 - 30,000 UGX	Yes	Yes	Boil	1	0	0	0	0	0	0
Bunyangabu	Bunyangabu	Buheesi Town Council	Rwensenene	Ibaale	203	2024-04-05	30	Mutooro	Catholic	Married	Less than 100,000	Man	Peasant farmer	No	No	No	No	No	Bore hole		Yes	30 minutes or less	5 - 10 people	20 - 30 years	Yes (but not enough)	Male child (< 15 years)	Less than 10,000UGX	No	No
Bunyangabu	Bunyangabu	Buheesi Town Council	Rwensenene	Ibaale	204	2024-04-05	20	Mutooro	Catholic	Single	Less than 100,000	Man	Unemployed	No	Yes	No	No	No	Piped Water		Yes	30 minutes or less	More than 10 people	10 - 20 years	Yes (but not enough)	Adult woman	20,000 - 30,000 UGX	Yes	Yes	Boil	1	0	0	0	0	0	0
Bunyangabu	Bunyangabu	Buheesi Town Council	Rwensenene	Ibaale	205	2024-04-05	35	Mutooro	Catholic	Separated	Less than 100,000	Woman	Peasant farmer	No	No	Yes	No	No	Public water tap		No	30 minutes or less	5 - 10 people	10 - 20 years	Yes (but not enough)	Adult woman	10,000 - 20,000UGX	Yes	Yes	Boil	1	0	0	0	0	0	0											Lack of fuel	1
Bunyangabu	Bunyangabu	Buheesi Town Council	Rwensenene	Ibaale	206	2024-04-05	52	Mutooro	Catholic	Single	100,00 to 500,000	Man	Civil servant	Yes	Yes	No	No	Yes	Piped Water		No	30 minutes or less	Less than 5 people	20 - 30 years	Yes (Enough)	Adult woman	20,000 - 30,000 UGX	No	Yes	Boil	1	0	0	0	0	0	0
Bunyangabu	Bunyangabu	Kiyombya Subcounty	Kiyombya	Birembo	1	2024-04-04	19	Mutooro	Anglican	Single	100,00 to 500,000	Man	Business man/woman	Yes	No	No	No	Yes	Unprotected shallow well		No	More than 30 minutes	Less than 5 people	10 - 20 years	Yes (but not enough)	Adult man	Less than 10,000UGX	Yes	No										Inadequate yield at the water source Otherchallenges	0	1	0	0	0	0	1	Most cases there is no water at the borehole	Lack of fuel	1
Bunyangabu	Bunyangabu	Kiyombya Subcounty	Kiyombya	Birembo	2	2024-04-04	50	Mutooro	Pentecostal	Married	100,00 to 500,000	Man	Business man/woman	Yes	No	No	No	Yes	Unprotected shallow well		Yes	30 minutes or less	Less than 5 people	20 - 30 years	Yes (but not enough)	Adult man	Less than 10,000UGX	Yes	No										Inadequate water sources Inadequate yield at the water source	1	1	0	0	0	0	0		Otherreasons Traditional beliefs	0
Bunyangabu	Bunyangabu	Kiyombya Subcounty	Kiyombya	Birembo	3	2024-04-04	40	Mutooro	Anglican	Divorced	100,00 to 500,000	Man	Business man/woman	Yes	No	No	No	Yes	Unprotected shallow well		Yes	30 minutes or less	Less than 5 people	30 - 40 years	Yes (but not enough)	Adult man	Less than 10,000UGX	No	No										Inadequate yield at the water source Inadequate water sources	1	1	0	0	0	0	0		Lack of fuel	1
Bunyangabu	Bunyangabu	Kiyombya Subcounty	Kiyombya	Birembo	4	2024-04-04	27	Mutooro	Anglican	Married	Less than 100,000	Man	Peasant farmer	No	No	No	No	Yes	Unprotected shallow well		Yes	30 minutes or less	Less than 5 people	10 - 20 years	Yes (but not enough)	Male child (< 15 years)	Less than 10,000UGX	Yes	No										Lack of energetic family members to collect the water	0	0	0	0	1	0	0		Lack of fuel	1
Bunyangabu	Bunyangabu	Kiyombya Subcounty	Kiyombya	Birembo	5	2024-04-04	56	Mutooro	Catholic	Married	100,00 to 500,000	Man	Peasant farmer	Yes	No	No	No	Yes	Unprotected shallow well		Yes	30 minutes or less	5 - 10 people	20 - 30 years	Yes (Enough)	Adult man	Less than 10,000UGX	Yes	No										Inadequate water sources	1	0	0	0	0	0	0		Lack of fuel	1
Bunyangabu	Bunyangabu	Kiyombya Subcounty	Kiyombya	Birembo	6	2024-04-04	44	Mutooro	Moslem	Divorced	Less than 100,000	Woman	Peasant farmer	Yes	No	No	No	Yes	Unprotected shallow well		Yes	30 minutes or less	Less than 5 people	20 - 30 years	Yes (but not enough)	Adult woman	Less than 10,000UGX	Yes	No										Otherchallenges Bad weather	0	0	1	0	0	0	1	bore hole got spoilt	Lack of fuel	1
Bunyangabu	Bunyangabu	Kiyombya Subcounty	Kiyombya	Birembo	7	2024-04-04	28	Mutooro	Anglican	Divorced	Less than 100,000	Woman	Peasant farmer	Yes	No	No	No	Yes	Unprotected shallow well		No	30 minutes or less	Less than 5 people	10 - 20 years	Yes (but not enough)	Adult woman	Less than 10,000UGX	Yes	No										Inadequate yield at the water source Lack of energetic family members to collect the water	0	1	0	0	1	0	0		Lack of fuel	1
Bunyangabu	Bunyangabu	Kiyombya Subcounty	Kiyombya	Birombo	8	2024-04-04	30	Mutooro	Moslem	Separated	Less than 100,000	Man	Peasant farmer	No	No	No	No	Yes	Public water tap		Yes	More than 30 minutes	Less than 5 people	20 - 30 years	Yes (Enough)	Adult man	Less than 10,000UGX	Yes	No										Inadequate water sources	1	0	0	0	0	0	0		Lack of fuel	1
Bunyangabu	Bunyangabu	Kiyombya Subcounty	Kiyombya	Birembo	9	2024-04-04	27	Mutooro	Catholic	Married	Less than 100,000	Man	Peasant farmer	Yes	No	No	No	Yes	Unprotected shallow well		Yes	More than 30 minutes	Less than 5 people	20 - 30 years	Yes (Enough)	Adult woman	Less than 10,000UGX	Yes	Yes	Boil	1	0	0	0	0	0	0		Inadequate water sources	1	0	0	0	0	0	0		Lack of fuel	1
Bunyangabu	Bunyangabu	Kiyombya Subcounty	Kiyombya	Kasura 1	10	2024-04-04	65	Munyankole	Anglican	Married	100,00 to 500,000	Man	Peasant farmer	Yes	No	No	No	Yes	Unprotected shallow well		Yes	30 minutes or less	Less than 5 people	20 - 30 years	Yes (Enough)	Adult woman	Less than 10,000UGX	Yes	No										Inadequate water sources	1	0	0	0	0	0	0		Lack of fuel	1
Bunyangabu	Bunyangabu	Kiyombya Subcounty	Kiyombya	Kasura 1	11	2024-04-04	30	Mutooro	Catholic	Married	Less than 100,000	Man	Business man/woman	Yes	No	No	No	Yes	Unprotected shallow well		No	30 minutes or less	Less than 5 people	10 - 20 years	Yes (but not enough)	Adult man	Less than 10,000UGX	Yes	No										Inadequate water sources	1	0	0	0	0	0	0		Lack of time	0
Bunyangabu	Bunyangabu	Kiyombya Subcounty	Kiyombya	Kasura 1	12	2024-04-04	26	Mutooro	Catholic	Married	Less than 100,000	Woman	Business man/woman	Yes	No	No	No	Yes	Unprotected shallow well		No	30 minutes or less	Less than 5 people	10 - 20 years	Yes (but not enough)	Adult woman	Less than 10,000UGX	Yes	No										Inadequate water sources	1	0	0	0	0	0	0		Lack of fuel	1
Bunyangabu	Bunyangabu	Kiyombya Subcounty	Kiyombya	Kasura 1	13	2024-04-04	18	Mutooro	Pentecostal	Married	Less than 100,000	Man	Peasant farmer	Yes	No	No	No	Yes	Unprotected shallow well		Yes	30 minutes or less	Less than 5 people	10 - 20 years	Yes (Enough)	Adult woman	Less than 10,000UGX	Yes	No										Inadequate water sources Bad weather	1	0	1	0	0	0	0		Lack of fuel	1
Bunyangabu	Bunyangabu	Kiyombya Subcounty	Kiyombya	Kasura 1	14	2024-04-04	38	Mutooro	Anglican	Married	100,00 to 500,000	Man	Peasant farmer	Yes	No	No	No	Yes	Unprotected shallow well		Yes	30 minutes or less	5 - 10 people	10 - 20 years	Yes (but not enough)	Adult woman	Less than 10,000UGX	Yes	Yes	Boil Use a water filter	1	0	0	1	0	0	0		Inadequate water sources Lack of energetic family members to collect the water	1	0	0	0	1	0	0		Lack of fuel	1
Bunyangabu	Bunyangabu	Kiyombya Subcounty	Kiyombya	Kasura 1	15	2024-04-04	40	Mutooro	Catholic	Married	Less than 100,000	Man	Peasant farmer	Yes	No	No	No	Yes	Unprotected shallow well		Yes	30 minutes or less	Less than 5 people	10 - 20 years	Yes (but not enough)	Adult woman	Less than 10,000UGX	Yes	No										Inadequate water sources Poor terrain	1	0	0	1	0	0	0		Lack of time	0
Bunyangabu	Bunyangabu	Kiyombya Subcounty	Kiyombya	Kasura 1	16	2024-04-04	27	Mutooro	Pentecostal	Married	Less than 100,000	Man	Peasant farmer	Yes	No	No	No	Yes	Unprotected shallow well		Yes	30 minutes or less	Less than 5 people	10 - 20 years	Yes (but not enough)	Adult woman	Less than 10,000UGX	Yes	No										Inadequate water sources	1	0	0	0	0	0	0		Lack of fuel Lack of time	1
Bunyangabu	Bunyangabu	Kiyombya Subcounty	Kiyombya	Kasura 1	17	2024-04-04	38	Mutooro	Catholic	Separated	100,00 to 500,000	Woman	Business man/woman	Yes	No	No	No	Yes	Unprotected shallow well		Yes	30 minutes or less	Less than 5 people	20 - 30 years	Yes (Enough)	Adult woman	10,000 - 20,000UGX	Yes	No										Inadequate water sources Lack of energetic family members to collect the water	1	0	0	0	1	0	0		Lack of fuel	1
Bunyangabu	Bunyangabu	Kiyombya Subcounty	Kiyombya	Kasura 1	19	2024-04-04	75	Mutooro	Catholic	Married	100,00 to 500,000	Man	Peasant farmer	No	No	No	No	Yes	Unprotected shallow well		Yes	More than 30 minutes	Less than 5 people	20 - 30 years	Yes (but not enough)	Adult man	Less than 10,000UGX	Yes	No										Inadequate water sources Lack of energetic family members to collect the water	1	0	0	0	1	0	0		Lack of time	0
Bunyangabu	Bunyangabu	Kiyombya Subcounty	Kiyombya	Kasura 1	19	2024-04-04	38	Mutooro	Pentecostal	Married	100,00 to 500,000	Woman	Peasant farmer	Yes	No	No	No	Yes	Unprotected shallow well		Yes	30 minutes or less	5 - 10 people	10 - 20 years	Yes (but not enough)	Adult woman	10,000 - 20,000UGX	No	No										Inadequate water sources Bad weather	1	0	1	0	0	0	0		Lack of time	0
Bunyangabu	Bunyangabu	Kiyombya Subcounty	Kiyombya	Kasura 1	20	2024-04-04	25	Mutooro	Pentecostal	Single	100,00 to 500,000	Woman	Business man/woman	Yes	No	No	No	Yes	Unprotected shallow well		Yes	30 minutes or less	Less than 5 people	20 - 30 years	Yes (Enough)	Adult woman	Less than 10,000UGX	Yes	No										Bad weather Inadequate water sources	1	0	1	0	0	0	0		Lack of time Lack of fuel	1
Bunyangabu	Bunyangabu	Kiyombya Subcounty	Piida Parish	Piida	21	2024-04-05	65	Mutooro	Pentecostal	Widowed	Less than 100,000	Woman	Peasant farmer	Yes	No	Yes	No	No	Public water tap		No	30 minutes or less	Less than 5 people	20 - 30 years	Yes (but not enough)	Female child (< 15 years)	Less than 10,000UGX	No	Yes	Boil	1	0	0	0	0	0	0											Lack of fuel	1
Bunyangabu	Bunyangabu	Kiyombya Subcounty	Piida Parish	Piida	22	2024-04-05	40	Mutooro	Catholic	Married	Less than 100,000	Woman	Peasant farmer	Yes	No	Yes	No	Yes	Bore hole		Yes	30 minutes or less	Less than 5 people	10 - 20 years	Yes (but not enough)	Female child (< 15 years)	Less than 10,000UGX	No	No										Poor terrain	0	0	0	1	0	0	0		Lack of fuel	1
Bunyangabu	Bunyangabu	Kiyombya Subcounty	Piida Parish	Piida	23	2024-04-05	32	Mutooro	Pentecostal	Married	Less than 100,000	Man	Peasant farmer	Yes	Yes	No	No	Yes	Bore hole		No	30 minutes or less	Less than 5 people	10 - 20 years	Yes (but not enough)	Adult woman	Less than 10,000UGX	Yes	No										Otherchallenges	0	0	0	0	0	0	1	none	Otherreasons	0
Bunyangabu	Bunyangabu	Kiyombya Subcounty	Piida Parish	Piida	24	2024-04-05	28	Mutooro	Pentecostal	Single	100,00 to 500,000	Woman	Peasant farmer	Yes	No	Yes	No	Yes	Bore hole		Yes	30 minutes or less	Less than 5 people	20 - 30 years	Yes (but not enough)	Adult woman	Less than 10,000UGX	Yes	No										Otherchallenges	0	0	0	0	0	0	1	none	Lack of fuel	1
Bunyangabu	Bunyangabu	Kiyombya Subcounty	Piida Parish	Piida	25	2024-04-05	58	Mutooro	Pentecostal	Married	Less than 100,000	Woman	Peasant farmer	No	No	Yes	Yes	Yes	Bore hole		Yes	30 minutes or less	Less than 5 people	10 - 20 years	Yes (but not enough)	Adult woman	Less than 10,000UGX	Yes	Yes	Boil	1	0	0	0	0	0	0											Lack of fuel	1
Bunyangabu	Bunyangabu	Kiyombya Subcounty	Piida Parish	Piida	26	2024-04-05	30	Mutooro	Pentecostal	Married	Less than 100,000	Woman	Peasant farmer	Yes	No	No	Yes	Yes	Bore hole		Yes	30 minutes or less	Less than 5 people	10 - 20 years	Yes (but not enough)	Adult woman	Less than 10,000UGX	Yes	Yes	Boil	1	0	0	0	0	0	0											Lack of fuel	1
Bunyangabu	Bunyangabu	Kiyombya Subcounty	Piida Parish	Piida	28	2024-04-05	75	Mutooro	Catholic	Widowed	100,00 to 500,000	Woman	Peasant farmer	Yes	Yes	No	Yes	Yes	Protected shallow well		Yes	30 minutes or less	Less than 5 people	30 - 40 years	Yes (but not enough)	Adult woman	Less than 10,000UGX	No	No										Otherchallenges	0	0	0	0	0	0	1	none	Lack of fuel	1
Bunyangabu	Bunyangabu	Kiyombya Subcounty	Piida Parish	Piida	27	2024-04-05	20	Mutooro	Pentecostal	Single	Less than 100,000	Woman	Peasant farmer	Yes	Yes	No	Yes	Yes	Bore hole		Yes	30 minutes or less	Less than 5 people	20 - 30 years	Yes (but not enough)	Adult woman	Less than 10,000UGX	Yes	Yes	Boil	1	0	0	0	0	0	0											Lack of fuel	1
Bunuangabu	Bunyangabu	Kiyombya Subcounty	Piida Parish	Piida	29	2024-04-05	18	Mutooro	Catholic	Single	100,00 to 500,000	Man	Peasant farmer	Yes	No	No	Yes	Yes	Protected shallow well		Yes	30 minutes or less	5 - 10 people	10 - 20 years	Yes (but not enough)	Adult woman	Less than 10,000UGX	No	No																			Lack of fuel	1
Bunyangabu	Bunyangabu	Kiyombya Subcounty	Piida Parish	Piida	30	2024-04-05	35	Mutooro	Pentecostal	Married	100,00 to 500,000	Man	Peasant farmer	Yes	Yes	No	Yes	Yes	Bore hole		Yes	30 minutes or less	Less than 5 people	10 - 20 years	Yes (but not enough)	Adult woman	Less than 10,000UGX	Yes	Yes	Boil	1	0	0	0	0	0	0											Lack of fuel	1
Bunyangabu	Bunyangabu	Kiyombya Subcounty	Piida Parish	Kinywabusera	31	2024-04-05	20	Mutooro	Catholic	Married	Less than 100,000	Woman	Business man/woman	No	No	Yes	Yes	Yes	Bore hole		Yes	30 minutes or less	Less than 5 people	10 - 20 years	Yes (Enough)	Adult woman	Less than 10,000UGX	No	No																			Otherreasons	0
Bunyangabu	Bunyangabu	Kiyombya Subcounty	Piida Parish	Kinywabusera	32	2024-04-05	28	Mutooro	Pentecostal	Married	100,00 to 500,000	Man	Business man/woman	Yes	No	Yes	No	Yes	Public water tap		Yes	30 minutes or less	Less than 5 people	10 - 20 years	Yes (but not enough)	Adult woman	Less than 10,000UGX	Yes	No										Lack of money to pay for the water	0	0	0	0	0	1	0		Lack of fuel	1
Bunyangabu	Bunyangabu	Kiyombya Subcounty	Piida Parish	Kinywabusera	33	2024-04-05	75	Mutooro	Catholic	Separated	Less than 100,000	Man	Peasant farmer	No	No	No	Yes	Yes	Bore hole		Yes	30 minutes or less	Less than 5 people	More than 40 years	Yes (but not enough)	Adult man	Less than 10,000UGX	Yes	No										Lack of energetic family members to collect the water	0	0	0	0	1	0	0		Otherreasons	0
Bunyangabu	Bunyangabu	Kiyombya Subcounty	Piida Parish	Kinywabusera	35	2024-04-05	26	Mutooro	Catholic	Married	100,00 to 500,000	Man	Peasant farmer	Yes	Yes	No	Yes	Yes	Protected shallow well		Yes	30 minutes or less	Less than 5 people	10 - 20 years	Yes (but not enough)	Adult woman	Less than 10,000UGX	No	No																			Lack of fuel	1
Bunyangabu	Bunyangabu	Kiyombya Subcounty	Piida Parish	Kinywabusera	34	2024-04-05	28	Mutooro	Pentecostal	Married	100,00 to 500,000	Man	Peasant farmer	Yes	No	No	Yes	Yes	Protected shallow well		Yes	30 minutes or less	Less than 5 people	10 - 20 years	Yes (but not enough)	Female child (< 15 years)	Less than 10,000UGX	No	No																			Otherreasons	0
Bunyangabu	Bunyangabu	Kiyombya Subcounty	Piida Parish	Kinywabusera	36	2024-04-05	21	Mutooro	Pentecostal	Single	Less than 100,000	Man	Peasant farmer	Yes	Yes	No	Yes	Yes	Rain Water Tank		No	30 minutes or less	Less than 5 people	10 - 20 years	Yes (but not enough)	Adult woman	Less than 10,000UGX	Yes	No										Bad weather	0	0	1	0	0	0	0		Otherreasons	0
Bunyangabu	Bunyangabu	Kiyombya Subcounty	Piida Parish	Kyakazini	40	2024-04-05	70	Mutooro	Pentecostal	Married	Less than 100,000	Man	Peasant farmer	Yes	No	Yes	Yes	Yes	Protected shallow well		No	More than 30 minutes	Less than 5 people	20 - 30 years	Yes (but not enough)	Adult woman	Less than 10,000UGX	No	Yes	Boil	1	0	0	0	0	0	0		Otherchallenges	0	0	0	0	0	0	1	Water source is far	Lack of fuel	1
Bunyangabu	Bunyangabu	Kiyombya Subcounty	Piida Parish	Kinywabusera	39	2024-04-05	42	Mutooro	Anglican	Married	100,00 to 500,000	Man	Peasant farmer	Yes	Yes	No	No	Yes	Piped Water		Yes	More than 30 minutes	Less than 5 people	10 - 20 years	Yes (but not enough)	Adult woman	Less than 10,000UGX	Yes	No										Lack of energetic family members to collect the water	0	0	0	0	1	0	0		Lack of fuel	1
Bunyangabu	Bunyangabu	Kiyombya Subcounty	Piida Parish	Kyakazini	38	2024-04-05	28	Mutooro	Anglican	Single	100,00 to 500,000	Man	Unemployed	Yes	Yes	No	No	Yes	Bore hole		Yes	More than 30 minutes	Less than 5 people	20 - 30 years	Yes (but not enough)	Adult man	Less than 10,000UGX	Yes	No										Poor terrain Otherchallenges	0	0	0	1	0	0	1	Water is far	Lack of fuel	1
Bunyangabu	Bunyangabu	Rwimi Subcounty	Kadindimo	Kadindimo village	308	2024-04-06	47	Mukiiga	Anglican	Married	100,00 to 500,000	Man	Peasant farmer	No	No	Yes	No	No	Public water tap		Yes	30 minutes or less	Less than 5 people	20 - 30 years	Yes (Enough)	Adult woman	Less than 10,000UGX	Yes	Yes	Boil	1	0	0	0	0	0	0		Inadequate water sources	1	0	0	0	0	0	0		Lack of fuel	1
Bunyangabu	Bunyangabu	Rwimi Subcounty	Kadindimo	Kadindimo village	309	2024-04-06	43	Mukiiga	Anglican	Married	100,00 to 500,000	Man	Peasant farmer	No	No	Yes	No	No	Public water tap		Yes	30 minutes or less	Less than 5 people	20 - 30 years	Yes (Enough)	Adult woman	Less than 10,000UGX	Yes	Yes	Boil	1	0	0	0	0	0	0		Inadequate water sources	1	0	0	0	0	0	0		Lack of fuel Lack of time	1
Bunyangabu	Bunyangabu	Rwimi Subcounty	Kadindimo	Kadindimo village	310	2024-04-06	35	Mukiiga	Catholic	Single	Less than 100,000	Man	Peasant farmer	No	No	Yes	No	No	Public water tap		Yes	30 minutes or less	Less than 5 people	20 - 30 years	Yes (Enough)	Adult man	Less than 10,000UGX	Yes	No										Inadequate water sources	1	0	0	0	0	0	0		Lack of fuel Lack of time Lack of knowledge	1
Bunyangabu	Bunyangabu	Rwimi Subcounty	Kadindimo	Kadindimo village	311	2024-04-06	42	Mukiiga	Moslem	Married	Less than 100,000	Man	Peasant farmer	No	No	Yes	No	No	Public water tap		Yes	More than 30 minutes	5 - 10 people	30 - 40 years	Yes (but not enough)	Female child (< 15 years)	Less than 10,000UGX	Yes	Yes	Boil	1	0	0	0	0	0	0		Inadequate water sources	1	0	0	0	0	0	0		Lack of fuel	1
Bunyangabu	Bunyangabu	Rwimi Subcounty	Kadindimo	Kadindimo village	312	2024-04-06	39	Mutooro	Moslem	Married	Less than 100,000	Woman	Peasant farmer	No	No	Yes	No	No	Public water tap		Yes	30 minutes or less	Less than 5 people	30 - 40 years	Yes (but not enough)	Female child (< 15 years)	Less than 10,000UGX	Yes	Yes	Boil	1	0	0	0	0	0	0		Inadequate water sources	1	0	0	0	0	0	0		Lack of fuel	1
Bunyangabu	Bunyangabu	Rwimi Subcounty	Kadindimo	Kadindimo village	313	2024-04-06	50	Mukiiga	SDA	Married	100,00 to 500,000	Man	Peasant farmer	No	No	Yes	No	No	Public water tap		Yes	30 minutes or less	5 - 10 people	20 - 30 years	Yes (Enough)	Adult woman	Less than 10,000UGX	Yes	Yes	Boil	1	0	0	0	0	0	0		Inadequate water sources	1	0	0	0	0	0	0		Lack of fuel	1
Bunyangabu	Bunyangabu	Rwimi Subcounty	Kadindimo	Kanyamukale	314	2024-04-06	50	Mukiiga	Catholic	Married	100,00 to 500,000	Man	Peasant farmer	No	No	Yes	No	No	Public water tap		Yes	30 minutes or less	Less than 5 people	20 - 30 years	Yes (Enough)	Female child (< 15 years)	Less than 10,000UGX	Yes	No										Inadequate water sources	1	0	0	0	0	0	0		Lack of fuel Lack of knowledge Lack of time	1
Bunyangabu	Bunyangabu	Rwimi Subcounty	Kadindimo	Kanyamukale	315	2024-04-06	40	Mutooro	Moslem	Married	100,00 to 500,000	Woman	Peasant farmer	No	No	Yes	No	No	Public water tap		Yes	30 minutes or less	Less than 5 people	30 - 40 years	Yes (Enough)	Female child (< 15 years)	10,000 - 20,000UGX	No	Yes	Boil	1	0	0	0	0	0	0		Inadequate water sources	1	0	0	0	0	0	0		Lack of fuel	1
Bunyangabu	Bunyangabu	Rwimi Subcounty	Kadindimo	Kanyamukale	316	2024-04-06	55	Mutooro	Catholic	Widowed	Less than 100,000	Woman	Peasant farmer	No	No	Yes	No	No	Public water tap		Yes	30 minutes or less	Less than 5 people	20 - 30 years	Yes (but not enough)	Adult woman	Less than 10,000UGX	Yes	Yes	Boil	1	0	0	0	0	0	0		Inadequate water sources	1	0	0	0	0	0	0		Lack of fuel	1
Bunyangabu	Bunyangabu	Rwimi Subcounty	Kadindimo	Kanyamukale	317	2024-04-06	57	Mukiiga	Anglican	Married	100,00 to 500,000	Man	Peasant farmer	No	No	Yes	No	No	Public water tap		Yes	30 minutes or less	Less than 5 people	30 - 40 years	Yes (but not enough)	Adult woman	10,000 - 20,000UGX	Yes	No										Inadequate water sources	1	0	0	0	0	0	0		Lack of fuel Lack of time	1
Bunyangabu	Bunyangabu	Rwimi Subcounty	Rweihara	Rweihara B	318	2024-04-06	24	Mukiiga	Anglican	Married	Less than 100,000	Woman	Peasant farmer	No	No	Yes	No	No	Public water tap		Yes	30 minutes or less	Less than 5 people	20 - 30 years	Yes (but not enough)	Adult woman	Less than 10,000UGX	Yes	Yes	Boil	1	0	0	0	0	0	0		Inadequate water sources	1	0	0	0	0	0	0		Lack of fuel	1
Bunyangabu	Bunyangabu	Rwimi Subcounty	Rweihara	Rweihara B	319	2024-04-06	36	Mukiiga	Moslem	Married	Less than 100,000	Woman	Peasant farmer	No	No	No	No	No	Public water tap		No	30 minutes or less	Less than 5 people	30 - 40 years	Yes (Enough)	Adult woman	Less than 10,000UGX	No	Yes	Boil	1	0	0	0	0	0	0		Inadequate water sources	1	0	0	0	0	0	0		Lack of fuel	1
Bunyangabu	Bunyangabu	Rwimi Subcounty	Rweihara	Rweihara B	320	2024-04-06	24	Mukiiga	Anglican	Married	Less than 100,000	Woman	Peasant farmer	No	No	Yes	No	No	Public water tap		Yes	30 minutes or less	Less than 5 people	20 - 30 years	Yes (Enough)	Adult woman	10,000 - 20,000UGX	No	No										Inadequate water sources	1	0	0	0	0	0	0		Lack of fuel Lack of time Negative attitude Lack of knowledge	1
Bunyangabu	Bunyangabu	Rwimi Subcounty	Rweihara	Rweihara B	321	2024-04-06	19	Mukiiga	Catholic	Married	100,00 to 500,000	Woman	Peasant farmer	No	No	Yes	No	No	Public water tap		No	30 minutes or less	Less than 5 people	20 - 30 years	Yes (but not enough)	Adult woman	Less than 10,000UGX	No	No										Inadequate water sources	1	0	0	0	0	0	0		Lack of fuel Lack of time Lack of knowledge	1
Bunyangabu	Bunyangabu	Kyamukube Town Council	Mutumba	Bihondo	266	2024-04-06	35	Mukonzo	Anglican	Married	100,00 to 500,000	Man	Business man/woman	No	No	No	No	No	Surface water	River	Yes	More than 30 minutes	5 - 10 people	20 - 30 years	Yes (but not enough)	Adult woman	10,000 - 20,000UGX	Yes	Yes	Boil	1	0	0	0	0	0	0		Inadequate water sources	1	0	0	0	0	0	0		Lack of time	0
Bunyangabu	Bunyangabu	Kyamukube Town Council	Mutumba	Bihondo	267	2024-04-06	50	Mukonzo	Anglican	Married	100,00 to 500,000	Woman	Peasant farmer	No	No	No	No	No	Surface water	River/stream	Yes	More than 30 minutes	5 - 10 people	20 - 30 years	Yes (Enough)	Adult woman	Less than 10,000UGX	Yes	No										Inadequate water sources	1	0	0	0	0	0	0		Lack of fuel Lack of time	1
Bunyangabu	Bunyangabu	Kyamukube Town Council	Mutumba	Bihondo	268		64	Mukonzo	Anglican	Married	100,00 to 500,000	Man	Peasant farmer	No	No	No	No	No	Surface water	River/stream	Yes	More than 30 minutes	More than 10 people	30 - 40 years	Yes (but not enough)	Adult woman	10,000 - 20,000UGX	Yes	No										Inadequate water sources	1	0	0	0	0	0	0		Lack of fuel Lack of knowledge Lack of time Negative attitude	1
Bunyangabu	Bunyangabu	Kyamukube Town Council	Mutumba	Mabura	669	2024-04-06	43	Mukonzo	SDA	Married	100,00 to 500,000	Man	Peasant farmer	No	No	No	No	No	Surface water	River or stream	Yes	More than 30 minutes	5 - 10 people	20 - 30 years	Yes (but not enough)	Female child (< 15 years)	10,000 - 20,000UGX	Yes	Yes	Boil	1	0	0	0	0	0	0		Inadequate water sources	1	0	0	0	0	0	0		Lack of fuel Lack of knowledge Lack of time	1
Bunyangabu	Bunyangabu	Kyamukube Town Council	Mutumba	Mabura	270	2024-04-06	43	Mukonzo	SDA	Married	Less than 100,000	Man	Peasant farmer	No	No	No	No	No	Surface water	River/stream	Yes	More than 30 minutes	Less than 5 people	20 - 30 years	Yes (Enough)	Adult woman	Less than 10,000UGX	Yes	No										Inadequate water sources	1	0	0	0	0	0	0		Lack of fuel	1
Bunyangabu	Bunyangabu	Kyamukube Town Council	Mutumba	Bihondo	271	2024-04-06	42	Mukonzo	SDA	Married	100,00 to 500,000	Man	Peasant farmer	No	No	No	No	No	Rain Water Tank	Protected spring	Yes	30 minutes or less	5 - 10 people	20 - 30 years	Yes (Enough)	Adult woman	Less than 10,000UGX	No	Yes	Let it stand and settle	0	0	0	0	0	1	0		Inadequate water sources	1	0	0	0	0	0	0		Lack of fuel Otherreasons	1
Bunyangabu	Bunyangabu	Kyamukube Town Council	Muttumba	Bihondo	272	2024-04-06	40	Mukonzo	SDA	Married	100,00 to 500,000	Man	Peasant farmer	No	No	No	No	No	Rain Water Tank	Protected water spring	Yes	30 minutes or less	5 - 10 people	20 - 30 years	Yes (but not enough)	Adult woman	Less than 10,000UGX	Yes	No										Inadequate water sources	1	0	0	0	0	0	0		Lack of fuel Lack of time	1
Bunyangabu	Bunyangabu	Kyamukube Town Council	Mutumba	Bihondo	273	2024-04-06	49	Mukonzo	SDA	Married	100,00 to 500,000	Man	Peasant farmer	No	No	No	No	No	Surface water	River or stream	Yes	More than 30 minutes	5 - 10 people	30 - 40 years	Yes (but not enough)	Adult woman	Less than 10,000UGX	Yes	Yes	Boil	1	0	0	0	0	0	0		Inadequate water sources	1	0	0	0	0	0	0		Lack of fuel Lack of knowledge Lack of time	1
Bunyangabu	Bunyangabu	Kyamukube Town Council	Mutumba	Mabura	274	2024-04-06	76	Mukonzo	Anglican	Widowed	Less than 100,000	Woman	Peasant farmer	No	No	No	No	No	Rain Water Tank	Protected water spring	Yes	More than 30 minutes	Less than 5 people	More than 40 years	Yes (but not enough)	Adult woman	Less than 10,000UGX	Yes	Yes	Boil	1	0	0	0	0	0	0		Inadequate water sources	1	0	0	0	0	0	0		Lack of fuel	1
Bunyangabu	Bunyangabu	Kyamukube Town Council	Mutumba	Kathoma	275	2024-04-06	62	Mukonzo	SDA	Married	100,00 to 500,000	Man	Peasant farmer	Yes	No	No	No	No	Rain Water Tank		Yes	30 minutes or less	5 - 10 people	30 - 40 years	Yes (Enough)	Adult woman	Less than 10,000UGX	Yes	Yes	Boil	1	0	0	0	0	0	0		Inadequate water sources	1	0	0	0	0	0	0		Lack of fuel Lack of time	1
Bunyangabu	Bunyangabu	Kyamukube Town Council	Mutumba	Kathoma	276	2024-04-06	46	Mukonzo	SDA	Widowed	Less than 100,000	Man	Peasant farmer	No	No	No	No	No	Surface water	Protected water spring	Yes	30 minutes or less	5 - 10 people	30 - 40 years	Yes (but not enough)	Adult woman	Less than 10,000UGX	Yes	No										Inadequate water sources	1	0	0	0	0	0	0		Lack of fuel Lack of time	1
Bunyangabu	Bunyangabu	Kyamukube Town Council	Mutumba	Kathoma	277	2024-04-06	49	Mukonzo	SDA	Married	100,00 to 500,000	Man	Peasant farmer	No	No	No	No	No	Public water tap	Protected water spring	Yes	More than 30 minutes	5 - 10 people	30 - 40 years	Yes (but not enough)	Adult woman	Less than 10,000UGX	No	Yes	Boil	1	0	0	0	0	0	0		Inadequate water sources	1	0	0	0	0	0	0		Lack of fuel Lack of time	1
Bunyangabu	Bunyangabu	Kyamukube Town Council	Mutumba	Bubandi	278	2024-04-06	60	Mukonzo	SDA	Married	500,00 to 1,000,000	Man	Peasant farmer	Yes	No	No	No	No	Public water tap	Protected water spring	Yes	30 minutes or less	5 - 10 people	30 - 40 years	Yes (but not enough)	Adult woman	Less than 10,000UGX	No	Yes	Boil	1	0	0	0	0	0	0		Inadequate water sources	1	0	0	0	0	0	0		Lack of fuel Lack of time	1
Bunyangabu	Bunyangabu	Kiyombya Subcounty	Nyamiseke	Nyakisi	42	2024-04-06	18	Mutooro	Catholic	Single	Less than 100,000	Man	Peasant farmer	No	No	No	No	Yes	Bore hole		Yes	More than 30 minutes	Less than 5 people	10 - 20 years	Yes (but not enough)	Adult woman	Less than 10,000UGX	Yes	No										Lack of energetic family members to collect the water Otherchallenges	0	0	0	0	1	0	1	well is open and sometimes we are scared of our children falling in	Otherreasons	0
Bunyangabu	Bunyangabu	Kiyombya Subcounty	Nyamiseke	Nyakisi	43	2024-04-06	19	Mutooro	Catholic	Married	Less than 100,000	Man	Peasant farmer	No	No	No	No	Yes	Bore hole		Yes	30 minutes or less	Less than 5 people	10 - 20 years	Yes (but not enough)	Adult woman	Less than 10,000UGX	No	No																			Otherreasons	0
Bunyangabu	Bunyangabu	Kiyombya Subcounty	Nyamiseke	Nyakisi	44	2024-04-06	28	Mutooro	Catholic	Married	100,00 to 500,000	Man	Peasant farmer	No	No	No	No	Yes	Bore hole		Yes	30 minutes or less	Less than 5 people	10 - 20 years	Yes (Enough)	Adult woman	Less than 10,000UGX	Yes	Yes	Boil	1	0	0	0	0	0	0		Otherchallenges	0	0	0	0	0	0	1	Unprotected well, scares of falling in	Lack of fuel	1
Bunyangabu	Bunyangabu	Kiyombya Subcounty	Nyamiseke	Nyakisi	45	2024-04-06	65	Mutooro	Catholic	Married	100,00 to 500,000	Man	Business man/woman	Yes	No	Yes	No	Yes	Bore hole		Yes	More than 30 minutes	5 - 10 people	10 - 20 years	Yes (but not enough)	Adult woman	Less than 10,000UGX	Yes	No										Inadequate water sources	1	0	0	0	0	0	0		Lack of fuel	1
Bunyangabu	Bunyangabu	Kiyombya Subcounty	Nyamiseke	Nyakisi	46	2024-04-06	20	Mutooro	Catholic	Married	100,00 to 500,000	Man	Business man/woman	Yes	No	No	No	Yes	Bore hole		Yes	30 minutes or less	Less than 5 people	10 - 20 years	Yes (Enough)	Adult woman	Less than 10,000UGX	No	No										Otherchallenges	0	0	0	0	0	0	1	open well which my kids may fall in
Bunyangabu	Bunyangabu	Kiyombya Subcounty	Nyamiseke	Nyakisi	47	2024-04-06	42	Mutooro	Catholic	Divorced	Less than 100,000	Woman	Peasant farmer	No	No	No	No	Yes	Bore hole		Yes	More than 30 minutes	Less than 5 people	10 - 20 years	Yes (but not enough)	Adult woman	Less than 10,000UGX	No	No										Otherchallenges	0	0	0	0	0	0	1	Open well	Negative attitude	0
Bunyangabu	Bunyangabu	kiyombya	Nyamiseke	Nyakisi	48	2024-04-06	39	Mutooro	Pentecostal	Married	100,00 to 500,000	Woman	Business man/woman	Yes	No	No	No	Yes	Bore hole		Yes	More than 30 minutes	5 - 10 people	10 - 20 years	Yes (but not enough)	Adult woman	Less than 10,000UGX	No	No										Inadequate water sources	1	0	0	0	0	0	0		Lack of fuel	1
Bunyangabu	Bunyangabu	Kiyombya Subcounty	Piida Parish	Kyakazini	50	2024-04-06	70	Mutooro	SDA	Married	100,00 to 500,000	Man	Business man/woman	Yes	No	Yes	Yes	Yes	Protected shallow well		Yes	30 minutes or less	Less than 5 people	10 - 20 years	Yes (but not enough)	Adult woman	10,000 - 20,000UGX	No	No
Bunyangabu	Bunyangabu	Kiyombya Subcounty	Nyamiseke	Nyakisi	49	2024-04-06	21	Mutooro	Anglican	Married	Less than 100,000	Man	Peasant farmer	No	No	No	No	Yes	Bore hole		Yes	More than 30 minutes	Less than 5 people	10 - 20 years	Yes (but not enough)	Female child (< 15 years)	Less than 10,000UGX	No	No										Otherchallenges	0	0	0	0	0	0	1	Open well, my child may fall in	Negative attitude	0
Bunyangabu	Bunyangabu	Kiyombya Subcounty	Piida Parish	Kyakazini	51	2024-04-06	55	Mutooro	Anglican	Married	Less than 100,000	Woman	Peasant farmer	No	No	Yes	No	Yes	Bore hole		Yes	30 minutes or less	Less than 5 people	20 - 30 years	Yes (Enough)	Adult woman	Less than 10,000UGX	Yes	No																			Lack of fuel	1
Bunyangabu	Bunyangabu	Kiyombya Subcounty	Piida Parish	Kyakazini	52	2024-04-06	37	Mutooro	Anglican	Married	Less than 100,000	Woman	Peasant farmer	Yes	No	No	Yes	Yes	Bore hole		Yes	30 minutes or less	Less than 5 people	10 - 20 years	Yes (but not enough)	Adult woman	Less than 10,000UGX	No	No										Otherchallenges	0	0	0	0	0	0	1		Negative attitude	0
Bunyangabu	Bunyangabu	Kiyombya Subcounty	Piida Parish	Kyakazini	53	2024-04-06	24	Mutooro	SDA	Married	Less than 100,000	Woman	Peasant farmer	Yes	No	Yes	Yes	Yes	Bore hole		No	More than 30 minutes	Less than 5 people	10 - 20 years	Yes (but not enough)	Adult woman	Less than 10,000UGX	No	No																			Lack of fuel	1
Bunyangabu	Bunyangabu	Kiyombya Subcounty	Piida Parish	Kyakazini	54	2024-04-06	36	Mutooro	SDA	Married	100,00 to 500,000	Woman	Business man/woman	No	No	Yes	Yes	Yes	Bore hole		No	30 minutes or less	Less than 5 people	10 - 20 years	Yes (but not enough)	Adult woman	Less than 10,000UGX	Yes	No										Inadequate water sources	1	0	0	0	0	0	0		Negative attitude	0
Bunyangabu	Bunyangabu	Kiyombya Subcounty	Piida Parish	Kyakazini	55	2024-04-06	41	Mutooro	Pentecostal	Divorced	100,00 to 500,000	Woman	Business man/woman	Yes	No	Yes	No	Yes	Bore hole		No	30 minutes or less	Less than 5 people	10 - 20 years	Yes (Enough)	Adult woman	Less than 10,000UGX	No	Yes	Boil	1	0	0	0	0	0	0		Lack of energetic family members to collect the water	0	0	0	0	1	0	0		Lack of fuel	1
Bunyangabu	Bunyangabu	Kiyombya Subcounty	Nyamiseke	Nyakisi	41	2024-04-06	40	Mutooro	Anglican	Married	Less than 100,000	Woman	Peasant farmer	Yes	No	No	No	Yes	Bore hole		Yes	30 minutes or less	Less than 5 people	10 - 20 years	Yes (but not enough)	Male child (< 15 years)	Less than 10,000UGX	No	No										Otherchallenges	0	0	0	0	0	0	1	The well is unprotected sometimes we are scared of our kids falling in	Lack of fuel	1
Bunyangabu	Bunyangabu	Rwimi Subcounty	Rweihara	Rweihara B	322	2024-04-06	33	Mutooro	Anglican	Married	Less than 100,000	Man	Peasant farmer	No	No	Yes	No	No	Public water tap		Yes	30 minutes or less	Less than 5 people	20 - 30 years	Yes (Enough)	Adult woman	Less than 10,000UGX	Yes	Yes	Boil	1	0	0	0	0	0	0		Inadequate water sources	1	0	0	0	0	0	0		Lack of fuel	1
Bunyangabu	Bunyangabu	Rwimi Subcounty	Rweihara	Rweihara B	333	2024-04-06	45	Mutooro	Anglican	Married	Less than 100,000	Woman	Peasant farmer	No	No	No	No	No	Public water tap		No	30 minutes or less	Less than 5 people	20 - 30 years	Yes (Enough)	Adult woman	Less than 10,000UGX	No	No										Inadequate water sources	1	0	0	0	0	0	0		Lack of fuel Lack of knowledge Lack of time	1
Bunyangabu	Bunyangabu	Rwimi Subcounty	Rweihara	Rweihara B	324	2024-04-06	46	Mukiiga	Anglican	Married	100,00 to 500,000	Man	Peasant farmer	No	No	Yes	No	No	Public water tap		Yes	30 minutes or less	Less than 5 people	20 - 30 years	Yes (but not enough)	Adult woman	10,000 - 20,000UGX	No	No										Inadequate water sources	1	0	0	0	0	0	0		Lack of knowledge Lack of time Negative attitude	0
Bunyangabu	Bunyangabu	Rwimi Subcounty	Rweihara	Rweihara B	325	2024-04-06	38	Mukiiga	Anglican	Married	Less than 100,000	Woman	Peasant farmer	No	No	Yes	No	No	Public water tap		Yes	30 minutes or less	Less than 5 people	20 - 30 years	Yes (Enough)	Adult woman	10,000 - 20,000UGX	No	No										Inadequate water sources	1	0	0	0	0	0	0		Lack of fuel Lack of knowledge Lack of time	1
Bunyangabu	Bunyangabu	Rwimi Subcounty	Rweihara	Rweihara B	326	2024-04-06	40	Mukiiga	Catholic	Separated	Less than 100,000	Woman	Peasant farmer	No	No	Yes	No	No	Public water tap		Yes	30 minutes or less	Less than 5 people	20 - 30 years	Yes (Enough)	Adult woman	Less than 10,000UGX	No	No										Inadequate water sources	1	0	0	0	0	0	0		Lack of fuel Lack of knowledge Negative attitude Lack of time	1
Bunyangabu	Bunyangabu	Kibiito	Mujunju	Mujunju central	149	2024-04-06	57	Mutooro	Catholic	Married	100,00 to 500,000	Man	Peasant farmer	No	No	No	Yes	No	Protected shallow well		Yes	More than 30 minutes	5 - 10 people	30 - 40 years	Yes (but not enough)	Adult woman	Less than 10,000UGX	No	Yes	Boil	1	0	0	0	0	0	0		Inadequate water sources	1	0	0	0	0	0	0		Negative attitude Lack of fuel	1
Bunyangabu	Bunyangabu	Kibiito	Mujunju	Mujunju central	150	2024-04-06	61	Mukiiga	Anglican	Married	100,00 to 500,000	Man	Business man/woman	No	No	No	Yes	No	Protected shallow well		No	More than 30 minutes	5 - 10 people	30 - 40 years	Yes (but not enough)	Adult woman	Less than 10,000UGX	No	No										Inadequate yield at the water source	0	1	0	0	0	0	0		Lack of fuel Negative attitude Lack of time	1
Bunyangabu	Bunyangabu	Kibiito	Mujunju	Mujunju central	151	2024-04-06	24	Mutooro	Pentecostal	Married	100,00 to 500,000	Man	Business man/woman	No	Yes	Yes	No	No	Public water tap		Yes	30 minutes or less	Less than 5 people	10 - 20 years	Yes (but not enough)	Adult woman	20,000 - 30,000 UGX	Yes	Yes	Boil	1	0	0	0	0	0	0		Inadequate water sources	1	0	0	0	0	0	0		Lack of fuel Lack of time	1
Bunyangabu	Bunyangabu	Kibiito	Mujunju	Mujunju central	152	2024-04-06	63	Mukiiga	Anglican	Married	100,00 to 500,000	Woman	Peasant farmer	No	Yes	Yes	No	No	Public water tap		Yes	More than 30 minutes	Less than 5 people	30 - 40 years	Yes (but not enough)	Adult woman	20,000 - 30,000 UGX	Yes	No										Inadequate yield at the water source	0	1	0	0	0	0	0		Lack of fuel Lack of time	1
Bunyangabu	Bunyangabu	Kibiito	Mujunju	Mujunju 1	153	2024-04-06	42	Mutooro	Pentecostal	Married	100,00 to 500,000	Man	Civil servant	Yes	No	No	No	No	Rain Water Tank	Protected spring	Yes	More than 30 minutes	5 - 10 people	20 - 30 years	Yes (but not enough)	Adult woman	Less than 10,000UGX	Yes	Yes	Boil	1	0	0	0	0	0	0		Inadequate yield at the water source	0	1	0	0	0	0	0		Lack of fuel Lack of time Negative attitude	1
Bunyangabu	Bunyangabu	Kibiito	Mujunju	Mujunju 1	154	2024-04-06	70	Mutooro	Catholic	Married	Less than 100,000	Man	Peasant farmer	No	No	No	No	No	Public water tap	Protected spring	Yes	More than 30 minutes	5 - 10 people	More than 40 years	Yes (but not enough)	Adult woman	Less than 10,000UGX	No	No										Inadequate yield at the water source	0	1	0	0	0	0	0		Lack of fuel Lack of time	1
Bunyangabu	Bunyangabu	Kibiito	Mujunju	Nyamugoro Kanyasinga	155	2024-04-06	80	Mukiiga	Catholic	Married	Less than 100,000	Man	Peasant farmer	No	Yes	Yes	No	No	Public water tap		Yes	30 minutes or less	5 - 10 people	More than 40 years	Yes (but not enough)	Female child (< 15 years)	20,000 - 30,000 UGX	Yes	Yes	Boil	1	0	0	0	0	0	0		Inadequate yield at the water source	0	1	0	0	0	0	0		Lack of fuel Traditional beliefs	1
Bunyangabu	Bunyangabu	Kibiito	Mujunju	Nyamugoro Kanyasinga	156	2024-04-06	25	Mutooro	Anglican	Married	100,00 to 500,000	Man	Peasant farmer	No	No	No	No	No	Surface water	Protected spring	Yes	More than 30 minutes	Less than 5 people	10 - 20 years	Yes (but not enough)	Adult woman	Less than 10,000UGX	Yes	No										Inadequate water sources Inadequate yield at the water source	1	1	0	0	0	0	0		Lack of fuel Lack of time	1
Bunyangabu	Bunyangabu	Kibiito	Mujunju	Nyamugoro Kanyasinga	157	2024-04-06	52	Mutooro	Anglican	Married	Less than 100,000	Man	Peasant farmer	No	Yes	Yes	No	No	Public water tap		Yes	More than 30 minutes	Less than 5 people	20 - 30 years	Yes (but not enough)	Adult woman	Less than 10,000UGX	Yes	No										Inadequate yield at the water source	0	1	0	0	0	0	0		Lack of fuel Lack of time	1
Bunyangabu	Bunyangabu	Kibiito	Mujunju	Nyamugoro Kanyasinga	158	2024-04-06	37	Mutooro	Moslem	Married	Less than 100,000	Man	Peasant farmer	No	No	No	Yes	No	Protected shallow well		No	More than 30 minutes	Less than 5 people	20 - 30 years	Yes (but not enough)	Adult woman	Less than 10,000UGX	No	Yes	Boil	1	0	0	0	0	0	0		Inadequate yield at the water source	0	1	0	0	0	0	0		Lack of fuel Lack of time	1
Bunyangabu	Bunyangabu	Kibiito	Mujunju	Nyamugoro Kanyasinga	159	2024-04-06	54	Mukiiga	Anglican	Married	100,00 to 500,000	Man	Peasant farmer	No	No	No	No	No	Protected shallow well		No	More than 30 minutes	5 - 10 people	30 - 40 years	Yes (but not enough)	Adult woman	10,000 - 20,000UGX	Yes	No										Inadequate water sources	1	0	0	0	0	0	0		Lack of fuel Lack of time Negative attitude	1
Bunyangabu	Bunyangabu	Kibiito	Mujunju	Nyamugoro Kanyasinga	160	2024-04-06	41	Mukiiga	Anglican	Married	Less than 100,000	Woman	Peasant farmer	No	Yes	Yes	No	No	Public water tap		Yes	30 minutes or less	Less than 5 people	20 - 30 years	Yes (but not enough)	Adult woman	Less than 10,000UGX	Yes	No										Inadequate water sources	1	0	0	0	0	0	0		Lack of fuel Lack of time	1
Bunyangabu	Bunyangabu	Kibiito	Mujunju	Nyamugoro Kanyasinga	161	2024-04-06	58	Mutooro	Mwikiriza	Married	100,00 to 500,000	Man	Peasant farmer	No	No	No	No	No	Surface water	Creator lake	Yes	More than 30 minutes	5 - 10 people	30 - 40 years	Yes (but not enough)	Female child (< 15 years)	Less than 10,000UGX	No	No										Lack of money to pay for the water	0	0	0	0	0	1	0		Lack of fuel Negative attitude Lack of time	1
Bunyangabu	Bunyangabu	Kibiito	Mujunju	Nyamugoro Kanyasinga	162	2024-04-06	50	Mutooro	Catholic	Single	Less than 100,000	Woman	Peasant farmer	No	No	No	No	No	Surface water	Creator lake	Yes	More than 30 minutes	5 - 10 people	30 - 40 years	Yes (but not enough)	Adult woman	Less than 10,000UGX	No	No										Inadequate water sources	1	0	0	0	0	0	0		Lack of fuel Lack of time	1
Bunyangabu	Bunyangabu	Kibiito	Mujunju	Nyamugoro Kyatwa	164	2024-04-06	62	Mukiiga	Catholic	Married	Less than 100,000	Man	Peasant farmer	No	No	No	No	No	Surface water	Creator lake	Yes	More than 30 minutes	More than 10 people	More than 40 years	Yes (but not enough)	Adult woman	Less than 10,000UGX	Yes	No										Inadequate water sources	1	0	0	0	0	0	0		Lack of fuel Lack of time	1
Bunyangabu	Bunyangabu	Kibiito	Mujunju	Nyamugoro Kyatwa	165	2024-04-06	36	Mukiiga	Catholic	Married	100,00 to 500,000	Man	Business man/woman	No	Yes	Yes	No	No	Public water tap		Yes	More than 30 minutes	5 - 10 people	20 - 30 years	Yes (but not enough)	Adult woman	10,000 - 20,000UGX	Yes	No										Inadequate water sources	1	0	0	0	0	0	0		Lack of fuel Lack of time	1
Bunyangabu	Bunyangabu	Kibiito	Mujunju	Nyamugoro Kyatwa	166	2024-04-06	58	Mutooro	Catholic	Married	100,00 to 500,000	Man	Peasant farmer	No	No	No	No	No	Surface water	Creator lake	Yes	More than 30 minutes	5 - 10 people	More than 40 years	Yes (but not enough)	Adult woman	Less than 10,000UGX	No	Yes	Boil	1	0	0	0	0	0	0		Inadequate water sources	1	0	0	0	0	0	0		Lack of fuel Lack of time	1
Bunyangabu	Bunyangabu	Kibiito	Mujunju	Nyamugoro Kyatwa	163	2024-04-06	52	Mutooro	Anglican	Married	100,00 to 500,000	Man	Peasant farmer	No	Yes	Yes	No	No	Piped Water		Yes	More than 30 minutes	5 - 10 people	30 - 40 years	Yes (but not enough)	Adult woman	10,000 - 20,000UGX	Yes	Yes	Boil	1	0	0	0	0	0	0		Inadequate water sources	1	0	0	0	0	0	0		Lack of fuel	1
Bunyangabu	Bunyangabu	Rwimi Subcounty	Rweihara	Rweihara A	329	2024-04-06	35	Mutooro	Anglican	Single	Less than 100,000	Man	Peasant farmer	No	No	Yes	No	No	Public water tap		Yes	30 minutes or less	Less than 5 people	20 - 30 years	Yes (but not enough)	Female child (< 15 years)	10,000 - 20,000UGX	Yes	No										Inadequate water sources	1	0	0	0	0	0	0		Lack of knowledge Lack of fuel Lack of time	1
Bunyangabu	Bunyangabu	Rwimi Subcounty	Rweihara	Rweihara A	327	2024-04-06	25	Mukiiga	Pentecostal	Married	Less than 100,000	Man	Peasant farmer	No	No	Yes	No	No	Public water tap		No	More than 30 minutes	Less than 5 people	20 - 30 years	Yes (but not enough)	Adult woman	Less than 10,000UGX	No	No										Inadequate water sources	1	0	0	0	0	0	0		Lack of fuel Lack of knowledge Lack of time	1
Bunyangabu	Bunyangabu	Rwimi Subcounty	Rweihara	Rweihara A	329	2024-04-06	35	Mukiiga	Catholic	Married	100,00 to 500,000	Woman	Peasant farmer	No	No	Yes	No	No	Public water tap		Yes	30 minutes or less	Less than 5 people	10 - 20 years	Yes (but not enough)	Adult man	10,000 - 20,000UGX	Yes	No										Inadequate water sources	1	0	0	0	0	0	0		Lack of knowledge Lack of time	0
Bunyangabu	Bunyangabu	Rwimi Subcounty	Rweihara	Rweihara A	329	2024-04-06	45	Mutooro	Anglican	Single	Less than 100,000	Man	Peasant farmer	No	No	Yes	No	No	Public water tap		Yes	More than 30 minutes	Less than 5 people	10 - 20 years	Yes (Enough)	Adult woman	10,000 - 20,000UGX	No	No										Inadequate water sources	1	0	0	0	0	0	0		Lack of fuel Lack of knowledge	1
Bunyangabu	Bunyangabu	Rwimi Subcounty	Rweihara	Rusoona	330	2024-04-06	28	Mutooro	Catholic	Single	Less than 100,000	Man	Peasant farmer	Yes	No	Yes	No	No	Public water tap		Yes	30 minutes or less	Less than 5 people	10 - 20 years	Yes (Enough)	Adult man	Less than 10,000UGX	Yes	No										Inadequate yield at the water source	0	1	0	0	0	0	0		Lack of fuel Lack of knowledge Lack of time	1
Bunyangabu	Bunyangabu	Rwimi Subcounty	Rweihara	Rusoona	331	2024-04-06	63	Mutooro	Anglican	Married	100,00 to 500,000	Man	Peasant farmer	No	No	Yes	No	No	Public water tap		Yes	30 minutes or less	Less than 5 people	30 - 40 years	Yes (but not enough)	Female child (< 15 years)	Less than 10,000UGX	Yes	No										Inadequate water sources	1	0	0	0	0	0	0		Lack of fuel Lack of knowledge Lack of time	1
Bunyangabu	Bunyangabu	Rwimi Subcounty	Rweihara	Rusoona	332	2024-04-06	33	Mukiiga	Moslem	Married	Less than 100,000	Man	Peasant farmer	No	No	Yes	No	No	Public water tap		Yes	30 minutes or less	Less than 5 people	20 - 30 years	Yes (but not enough)	Female child (< 15 years)	Less than 10,000UGX	Yes	No										Inadequate water sources	1	0	0	0	0	0	0		Lack of fuel Lack of knowledge	1
Bunyangabu	Bunyangabu	Kakinga TC	Kakinga Central	Kakinga B	78	2024-04-05	35	Mukiiga	Moslem	Married	100,00 to 500,000	Woman	Peasant farmer	No	No	Yes	No	No	Public water tap		No	30 minutes or less	Less than 5 people	20 - 30 years	Yes (but not enough)	Adult woman	Less than 10,000UGX	Yes	No										Lack of energetic family members to collect the water	0	0	0	0	1	0	0		Lack of fuel Lack of time	1
Bunyangabu	Bunyangabu	Kakinga TC	Kakinga Central	Kakinga B	79	2024-04-05	59	Mukiiga	Catholic	Married	100,00 to 500,000	Man	Peasant farmer	No	Yes	Yes	No	No	Public water tap		Yes	30 minutes or less	Less than 5 people	20 - 30 years	Yes (but not enough)	Adult woman	Less than 10,000UGX	No	Yes	Boil	1	0	0	0	0	0	0		Inadequate water sources	1	0	0	0	0	0	0		Lack of fuel Lack of knowledge Lack of time	1
Bunyangabu	Bunyangabu	Buheesi Town Council	Bukiika	Katooke	207	2024-04-06	44	Mutooro	Catholic	Divorced	Less than 100,000	Woman	Peasant farmer	No	No	No	No	Yes	Bore hole		Yes	30 minutes or less	5 - 10 people	10 - 20 years	Yes (but not enough)	Adult woman	Less than 10,000UGX	No	Yes	Boil	1	0	0	0	0	0	0		Inadequate water sources Inadequate yield at the water source	1	1	0	0	0	0	0		Lack of fuel	1
Bunyangabu	Bunyangabu	Buheesi Town Council	Rwensenene	Katooke	208	2024-04-06	24	Mutooro	Catholic	Single	Less than 100,000	Man	Peasant farmer	No	No	No	No	No	Surface water	Protected spring	No	More than 30 minutes	5 - 10 people	20 - 30 years	Yes (but not enough)	Male child (< 15 years)	Less than 10,000UGX	No	No										Inadequate water sources Inadequate yield at the water source	1	1	0	0	0	0	0		Lack of fuel	1
Bunyangabu	Bunyangabu	Buheesi Town Council	Bukiika	Katooke	209	2024-04-06	50	Mutooro	Catholic	Married	Less than 100,000	Man	Peasant farmer	No	Yes	No	No	No	Piped Water		No	30 minutes or less	More than 10 people	20 - 30 years	Yes (but not enough)	Female child (< 15 years)	10,000 - 20,000UGX	No	No										Inadequate water sources	1	0	0	0	0	0	0		Lack of fuel	0
Bunyangabu	Bunyangabu	Buheesi Town Council	Bukiika	Bukiika II	212	2024-04-06	30	Mutooro	Catholic	Married	100,00 to 500,000	Man	Peasant farmer	Yes	Yes	No	No	No	Piped Water		No	30 minutes or less	5 - 10 people	20 - 30 years	Yes (but not enough)	Adult woman	10,000 - 20,000UGX	Yes	Yes	Boil	1	0	0	0	0	0	0		Inadequate water sources	1	0	0	0	0	0	0
Bunyangabu	Bunyangabu	Buheesi Town Council	Bukiika	Bukiika II	213	2024-04-06	67	Mutooro	Catholic	Widowed	Less than 100,000	Woman	Business man/woman	No	No	No	No	No	Surface water	Protected spring	Yes	30 minutes or less	5 - 10 people	10 - 20 years	Yes (but not enough)	Female child (< 15 years)	Less than 10,000UGX	No	No										Inadequate water sources	1	0	0	0	0	0	0		Lack of knowledge	0
Bunyangabu	Bunyangabu	Buheesi Town Council	Bukiika	Bukiika II	214	2024-04-06	52	Mutooro	Anglican	Married	Less than 100,000	Man	Peasant farmer	No	Yes	No	No	No	Piped Water		No	30 minutes or less	5 - 10 people	20 - 30 years	Yes (but not enough)	Adult woman	10,000 - 20,000UGX	Yes	Yes	Boil	1	0	0	0	0	0	0
Bunyangabu	Bunyangabu	Buheesi Town Council	Bukiika	Bukiika II	215	2024-04-06	66	Mutooro	Catholic	Single	100,00 to 500,000	Woman	Unemployed	No	No	No	No	No	Unprotected shallow well		Yes	30 minutes or less	Less than 5 people	20 - 30 years	Yes (but not enough)	Male child (< 15 years)	Less than 10,000UGX	No	Yes	Boil	1	0	0	0	0	0	0											Lack of fuel	1
Bunyangabu	Bunyangabu	Buheesi Town Council	Bukiika	Katurru	216	2024-04-06	46	Mutooro	Catholic	Married	100,00 to 500,000	Man	Peasant farmer	No	No	No	No	Yes	Bore hole		No	30 minutes or less	5 - 10 people	20 - 30 years	Yes (but not enough)	Female child (< 15 years)	Less than 10,000UGX	No	No										Inadequate water sources	1	0	0	0	0	0	0		Negative attitude	0
Bunyangabu	Bunyangabu	Buheesi Town Council	Bukiika	Bukiika II	217	2024-04-06	42	Mutooro	Catholic	Widowed	Less than 100,000	Woman	Peasant farmer	Yes	No	No	No	Yes	Bore hole		Yes	More than 30 minutes	Less than 5 people	20 - 30 years	Yes (Enough)	Adult woman	Less than 10,000UGX	No	No										Inadequate water sources	1	0	0	0	0	0	0		Lack of fuel	1
Bunyangabu	Bunyangabu	Buheesi Town Council	Bukiika	Katurru	218	2024-04-06	56	Mutooro	Catholic	Married	500,00 to 1,000,000	Man	Civil servant	No	No	No	No	No	Unprotected shallow well		No	30 minutes or less	More than 10 people	20 - 30 years	Yes (but not enough)	Adult woman	Less than 10,000UGX	No	Yes	Boil	1	0	0	0	0	0	0		Inadequate water sources	1	0	0	0	0	0	0
Bunyangabu	Bunyangabu	Buheesi Town Council	Bukiika	Byerema	219	2024-04-06	44	Mutooro	Catholic	Married	Less than 100,000	Man	Peasant farmer	No	No	No	No	Yes	Bore hole		Yes	30 minutes or less	5 - 10 people	10 - 20 years	Yes (but not enough)	Female child (< 15 years)	Less than 10,000UGX	No	No										Inadequate water sources	1	0	0	0	0	0	0		Lack of knowledge	0
Bunyangabu	Bunyangabu	Buheesi Town Council	Bukiika	Byerema	220	2024-04-06	65	Mutooro	Catholic	Married	100,00 to 500,000	Man	Peasant farmer	No	Yes	No	No	Yes	Piped Water		No	30 minutes or less	5 - 10 people	20 - 30 years	Yes (but not enough)	Adult woman	10,000 - 20,000UGX	Yes	Yes	Boil	1	0	0	0	0	0	0											Lack of fuel	1
Bunyangabu	Bunyangabu	Buheesi Town Council	Bukiika	Byerema	221	2024-04-06	60	Mutooro	Catholic	Separated	Less than 100,000	Woman	Peasant farmer	No	No	No	No	Yes	Bore hole		Yes	30 minutes or less	Less than 5 people	20 - 30 years	Yes (but not enough)	Adult woman	Less than 10,000UGX	No	Yes	Boil	1	0	0	0	0	0	0											Lack of fuel	1
Bunyangabu	Bunyangabu	Buheesi Town Council	Bukiika	Katooke	210	2024-04-06	58	Mutooro	Catholic	Married	100,00 to 500,000	Man	Peasant farmer	No	Yes	No	No	Yes	Piped Water		No	30 minutes or less	5 - 10 people	10 - 20 years	Yes (but not enough)	Adult woman	Less than 10,000UGX	Yes	Yes	Boil	1	0	0	0	0	0	0											Lack of fuel	1
Bunyangabu	Bunyangabu	Buheesi Town Council	Bukiika	Katooke	211	2024-04-06	55	Mutooro	Catholic	Married	Less than 100,000	Woman	Peasant farmer	No	Yes	No	No	No	Bore hole	Protected spring	Yes	30 minutes or less	5 - 10 people	10 - 20 years	Yes (but not enough)	Adult woman	Less than 10,000UGX	Yes	Yes	Boil	1	0	0	0	0	0	0
Bunyangabu	Bunyangabu	Buheesi Town Council	Bukiika	Byerema	222	2024-04-06	57	Mutooro	Catholic	Separated	Less than 100,000	Woman	Peasant farmer	No	Yes	No	No	Yes	Bore hole		Yes	30 minutes or less	5 - 10 people	20 - 30 years	Yes (but not enough)	Adult woman	10,000 - 20,000UGX	Yes	Yes	Boil	1	0	0	0	0	0	0											Lack of fuel	1
Bunyangabu	Bunyangabu	Kakinga TC	Kajumiro ward	Kajumiro B	80	2024-04-06	51	Mukiiga	Catholic	Married	100,00 to 500,000	Man	Peasant farmer	No	No	No	No	Yes	Bore hole		Yes	More than 30 minutes	5 - 10 people	30 - 40 years	Yes (but not enough)	Adult woman	Less than 10,000UGX	Yes	No										Lack of energetic family members to collect the water	0	0	0	0	1	0	0		Lack of time Lack of fuel	1
Bunyangabu	Bunyangabu	Kakinga TC	Kajumiro ward	Kajumiro B	81	2024-04-06	41	Mukiiga	Catholic	Married	Less than 100,000	Man	Peasant farmer	No	No	No	No	No	Bore hole		Yes	More than 30 minutes	5 - 10 people	30 - 40 years	Yes (but not enough)	Male child (< 15 years)	Less than 10,000UGX	Yes	No										Inadequate water sources	1	0	0	0	0	0	0		Lack of time Lack of fuel	1
Bunyangabu	Bunyangabu	Kakinga TC	Kajumiro ward	Kajumiro B	82	2024-04-06	38	Mukiiga	Catholic	Married	Less than 100,000	Man	Peasant farmer	No	No	No	No	No	Bore hole		Yes	More than 30 minutes	Less than 5 people	20 - 30 years	Yes (but not enough)	Adult woman	Less than 10,000UGX	Yes	No										Lack of energetic family members to collect the water	0	0	0	0	1	0	0		Lack of fuel	1
Bunyangabu	Bunyangabu	Kakinga TC	Kajumiro ward	Kajumiro C	83	2024-04-06	49	Mukiiga	Anglican	Widowed	Less than 100,000	Man	Peasant farmer	No	No	No	No	No	Bore hole		Yes	More than 30 minutes	Less than 5 people	20 - 30 years	Yes (but not enough)	Adult man	Less than 10,000UGX	Yes	No										Bad weather	0	0	1	0	0	0	0		Lack of fuel Lack of time	1
Bunyangabu	Bunyangabu	Kakinga TC	Kajumiro ward	Kajumiro C	84	2024-04-06	61	Mukiiga	Anglican	Married	100,00 to 500,000	Man	Peasant farmer	No	No	No	No	No	Bore hole		No	More than 30 minutes	More than 10 people	More than 40 years	Yes (but not enough)	Adult woman	10,000 - 20,000UGX	No	No										Inadequate water sources	1	0	0	0	0	0	0		Lack of fuel Lack of time	1
Bunyangabu	Bunyangabu	Kakinga TC	Kajumiro ward	Kajumiro C	85	2024-04-06	59	Mukiiga	Anglican	Married	100,00 to 500,000	Man	Peasant farmer	No	No	No	No	Yes	Bore hole		Yes	More than 30 minutes	5 - 10 people	More than 40 years	Yes (but not enough)	Male child (< 15 years)	Less than 10,000UGX	No	No										Inadequate water sources	1	0	0	0	0	0	0		Lack of fuel Lack of time	1
Bunyangabu	Bunyangabu	Kakinga TC	Kajumiro ward	Kajumiro C	86	2024-04-06	45	Mukiiga	Anglican	Widowed	Less than 100,000	Woman	Peasant farmer	No	No	No	No	Yes	Bore hole		Yes	30 minutes or less	Less than 5 people	20 - 30 years	Yes (but not enough)	Adult woman	Less than 10,000UGX	Yes	No										Lack of energetic family members to collect the water	0	0	0	0	1	0	0		Lack of knowledge	0
Bunyangabu	Bunyangabu	Kakinga TC	Kajumiro ward	Kajumiro C	87	2024-04-06	58	Mukiiga	Anglican	Married	100,00 to 500,000	Man	Peasant farmer	No	No	No	No	Yes	Bore hole		Yes	More than 30 minutes	Less than 5 people	30 - 40 years	Yes (but not enough)	Adult woman	Less than 10,000UGX	No	No										Lack of energetic family members to collect the water	0	0	0	0	1	0	0		Lack of fuel Lack of time	1
Bunyangabu	Bunyangabu	Kakinga TC	Kajumiro ward	Kajumiro C	88	2024-04-06	50	Mukiiga	Anglican	Married	Less than 100,000	Man	Peasant farmer	No	No	No	No	No	Bore hole		Yes	30 minutes or less	Less than 5 people	20 - 30 years	Yes (but not enough)	Adult woman	Less than 10,000UGX	No	Yes	Boil	1	0	0	0	0	0	0		Inadequate water sources	1	0	0	0	0	0	0		Otherreasons	0
Bunyangabu	Bunyangabu	Kakinga TC	Kajumiro ward	Kajumiro C	89	2024-04-06	98	Mukiiga	Anglican	Widowed	Less than 100,000	Man	Peasant farmer	No	No	No	No	Yes	Bore hole		Yes	30 minutes or less	Less than 5 people	More than 40 years	Yes (but not enough)	Male child (< 15 years)	Less than 10,000UGX	No	Yes	Boil	1	0	0	0	0	0	0		Inadequate water sources	1	0	0	0	0	0	0		Lack of knowledge Lack of time	0
Bunyangabu	Bunyangabu	Kakinga TC	Kajumiro ward	Kajumiro C	90	2024-04-06	25	Mukiiga	Anglican	Married	Less than 100,000	Man	Peasant farmer	No	No	No	No	Yes	Bore hole		Yes	30 minutes or less	Less than 5 people	10 - 20 years	Yes (but not enough)	Adult woman	Less than 10,000UGX	No	Yes	Boil	1	0	0	0	0	0	0		Inadequate water sources	1	0	0	0	0	0	0		Lack of time Lack of fuel	1
Bunyangabu	Bunyangabu	Kakinga TC	Kakooga ward	Kakooga A	91	2024-04-06	53	Mukiiga	Catholic	Married	100,00 to 500,000	Man	Peasant farmer	Yes	No	No	No	No	Rain Water Tank		No	30 minutes or less	Less than 5 people	20 - 30 years	Yes (Enough)	Adult woman	10,000 - 20,000UGX	No	Yes	Boil Add bleach/chlorine	1	1	0	0	0	0	0		Inadequate water sources	1	0	0	0	0	0	0		Lack of fuel	1
Bunyangabu	Bunyangabu	Kakinga TC	Kakooga ward	Kakooga A	92		38	Mukiiga	Catholic	Cohabiting	Less than 100,000	Woman	Business man/woman	No	No	Yes	No	Yes	Public water tap		No	30 minutes or less	Less than 5 people	20 - 30 years	Yes (but not enough)	Adult woman	Less than 10,000UGX	Yes	No										Lack of energetic family members to collect the water	0	0	0	0	1	0	0		Otherreasons	0
Bunyangabu	Bunyangabu	Kakinga TC	Kakooga ward	Kakooga A	93	2024-04-06	43	Mukiiga	Anglican	Divorced	Less than 100,000	Woman	Business man/woman	No	No	Yes	No	Yes	Public water tap		Yes	30 minutes or less	Less than 5 people	20 - 30 years	Yes (but not enough)	Adult woman	Less than 10,000UGX	Yes	No										Lack of energetic family members to collect the water	0	0	0	0	1	0	0		Lack of fuel Lack of time	1
Bunyangabu	Bunyangabu	Kakinga TC	Kakooga Ward	Kakooga A	94	2024-04-06	40	Mukiiga	Catholic	Married	Less than 100,000	Man	Peasant farmer	No	No	Yes	No	Yes	Bore hole		Yes	30 minutes or less	Less than 5 people	10 - 20 years	Yes (but not enough)	Adult man	Less than 10,000UGX	No	Yes	Boil	1	0	0	0	0	0	0		Inadequate water sources	1	0	0	0	0	0	0		Lack of time	0
Bunyangabu	Bunyangabu	Kakinga TC	Kakooga ward	Kakooga A	95	2024-04-06	42	Mukiiga	Catholic	Widowed	Less than 100,000	Woman	Business man/woman	No	No	Yes	No	Yes	Bore hole		Yes	30 minutes or less	Less than 5 people	20 - 30 years	Yes (but not enough)	Adult woman	Less than 10,000UGX	Yes	No										Lack of energetic family members to collect the water	0	0	0	0	1	0	0		Lack of fuel Lack of time	1
Bunyangabu	Bunyangabu	Kakinga TC	Kakooga ward	Kakooga A	96	2024-04-06	41	Mukiiga	Anglican	Married	100,00 to 500,000	Man	Business man/woman	No	No	No	No	Yes	Bore hole		Yes	30 minutes or less	5 - 10 people	20 - 30 years	Yes (but not enough)	Adult woman	Less than 10,000UGX	No	Yes	Boil	1	0	0	0	0	0	0		Inadequate water sources	1	0	0	0	0	0	0		Lack of time	0
Bunyangabu	Bunyangabu	Kakinga TC	Kakooga ward	Kakooga A	97	2024-04-06	58	Mukiiga	Anglican	Widowed	Less than 100,000	Woman	Peasant farmer	No	No	No	No	Yes	Bore hole		Yes	More than 30 minutes	Less than 5 people	30 - 40 years	Yes (but not enough)	Adult woman	Less than 10,000UGX	Yes	No										Lack of energetic family members to collect the water	0	0	0	0	1	0	0		Lack of fuel	1
Bunyangabu	Bunyangabu	Kakinga TC	Rubalika Ward	Rubalika 2A	98	2024-04-06	41	Mukiiga	Anglican	Married	Less than 100,000	Man	Peasant farmer	No	No	Yes	No	No	Public water tap		No	30 minutes or less	Less than 5 people	30 - 40 years	Yes (but not enough)	Adult woman	Less than 10,000UGX	No	No										Lack of energetic family members to collect the water	0	0	0	0	1	0	0		Lack of fuel	1
Bunyangabu	Bunyangabu	Kakinga TC	Rubalika Ward	Rubalika 2A	99	2024-04-06	51	Mukiiga	Anglican	Married	Less than 100,000	Man	Business man/woman	No	Yes	Yes	No	No	Public water tap		No	30 minutes or less	Less than 5 people	30 - 40 years	Yes (but not enough)	Adult woman	Less than 10,000UGX	Yes	No										Inadequate water sources	1	0	0	0	0	0	0		Otherreasons	0
Bunyangabu	Bunyangabu	Kakinga TC	Rubalika Ward	Rubalika 2A	100	2024-04-06	42	Mukiiga	SDA	Married	Less than 100,000	Man	Business man/woman	No	No	Yes	No	No	Public water tap		No	30 minutes or less	5 - 10 people	20 - 30 years	Yes (but not enough)	Adult woman	Less than 10,000UGX	No	Yes	Boil	1	0	0	0	0	0	0		Inadequate water sources	1	0	0	0	0	0	0		Lack of time	0
Bunyangabu	Bunyangabu	Kakinga TC	Rubalika Ward	Rubalika 2A	101	2024-04-06	30	Mukiiga	Catholic	Married	Less than 100,000	Man	Peasant farmer	No	No	Yes	No	No	Public water tap		No	30 minutes or less	Less than 5 people	10 - 20 years	Yes (but not enough)	Adult woman	Less than 10,000UGX	Yes	No										Inadequate water sources	1	0	0	0	0	0	0		Lack of fuel	1
Bunyangabu	Bunyangabu	Kakinga TC	Rubalika Ward	Rubalika 2A	102	2024-04-06	26	Mukiiga	Anglican	Single	Less than 100,000	Woman	Peasant farmer	No	No	Yes	No	No	Public water tap		Yes	30 minutes or less	Less than 5 people	20 - 30 years	Yes (but not enough)	Adult woman	Less than 10,000UGX	Yes	No										Inadequate water sources	1	0	0	0	0	0	0		Otherreasons	0
Bunyangabu	Bunyangabu	Kakinga TC	Rubalika Ward	Rubalika 2A	103	2024-04-06	37	Mukiiga	Catholic	Married	100,00 to 500,000	Man	Peasant farmer	No	No	Yes	No	No	Public water tap		No	30 minutes or less	Less than 5 people	20 - 30 years	Yes (but not enough)	Adult woman	Less than 10,000UGX	Yes	No										Inadequate water sources	1	0	0	0	0	0	0		Lack of fuel Lack of time	1
Bunyangabu	Bunyangabu	Kakinga TC	Rugaaga ward	Rugaaga	104	2024-04-07	48	Mutooro	Catholic	Married	Less than 100,000	Man	Peasant farmer	No	No	Yes	No	No	Public water tap		No	More than 30 minutes	Less than 5 people	20 - 30 years	Yes (but not enough)	Adult woman	Less than 10,000UGX	Yes	No										Inadequate water sources	1	0	0	0	0	0	0		Lack of fuel	1
Bunyangabu	Bunyangabu	Kakinga TC	Rugaaga ward	Rugaaga	105	2024-04-07	52	Mukiiga	Catholic	Married	Less than 100,000	Woman	Peasant farmer	No	No	Yes	No	No	Public water tap		No	30 minutes or less	Less than 5 people	10 - 20 years	Yes (but not enough)	Adult woman	Less than 10,000UGX	Yes	Yes	Boil Add bleach/chlorine	1	1	0	0	0	0	0		Inadequate water sources	1	0	0	0	0	0	0		Lack of fuel Lack of time	1
Bunyangabu	Bunyangabu	Kakinga TC	Rugaaga ward	Rugaaga	106	2024-04-07	39	Mukonzo	SDA	Married	Less than 100,000	Man	Peasant farmer	No	No	No	No	No	Public water tap		No	30 minutes or less	5 - 10 people	20 - 30 years	Yes (but not enough)	Female child (< 15 years)	Less than 10,000UGX	No	No										Bad weather	0	0	1	0	0	0	0		Otherreasons	0
Bunyangabu	Bunyangabu	Kakinga TC	Rugaaga ward	Rugaaga	107	2024-04-07	63	Mukiiga	Anglican	Married	Less than 100,000	Man	Peasant farmer	Yes	No	Yes	No	No	Public water tap		No	30 minutes or less	5 - 10 people	30 - 40 years	Yes (Enough)	Adult woman	Less than 10,000UGX	No	Yes	Boil Add bleach/chlorine	1	1	0	0	0	0	0		Lack of energetic family members to collect the water	0	0	0	0	1	0	0		Lack of time	0
Bunyangabu	Bunyangabu	Kakinga TC	Rugaaga ward	Rugaaga	108	2024-04-07	61	Mukiiga	Catholic	Married	Less than 100,000	Man	Peasant farmer	No	No	Yes	No	No	Public water tap		Yes	More than 30 minutes	5 - 10 people	20 - 30 years	Yes (but not enough)	Adult woman	Less than 10,000UGX	Yes	No										Bad weather	0	0	1	0	0	0	0		Lack of fuel Lack of time	1
Bunyangabu	Bunyangabu	Kakinga TC	Rugaaga ward	Rugaaga	109	2024-04-07	50	Mutooro	Catholic	Married	Less than 100,000	Man	Peasant farmer	Yes	No	Yes	No	No	Public water tap		Yes	30 minutes or less	Less than 5 people	20 - 30 years	Yes (but not enough)	Female child (< 15 years)	Less than 10,000UGX	Yes	Yes	Boil Use a water filter	1	0	0	1	0	0	0		Lack of energetic family members to collect the water	0	0	0	0	1	0	0		Otherreasons	0
Bunyangabu	Bunyangabu	Kakinga TC	Rugaaga ward	Mirambi	110	2024-04-07	52	Mukiiga	Anglican	Married	Less than 100,000	Man	Peasant farmer	Yes	No	Yes	No	No	Public water tap		No	30 minutes or less	Less than 5 people	10 - 20 years	Yes (but not enough)	Adult woman	Less than 10,000UGX	Yes	No										Lack of energetic family members to collect the water Bad weather	0	0	1	0	1	0	0		Otherreasons	0
Bunyangabu	Bunyangabu	Kakinga TC	Rugaaga ward	Mirambi	111	2024-04-07	85	Mukiiga	Catholic	Widowed	100,00 to 500,000	Woman	Business man/woman	No	No	Yes	No	No	Public water tap		No	30 minutes or less	More than 10 people	More than 40 years	Yes (but not enough)	Adult woman	10,000 - 20,000UGX	Yes	Yes	Boil Add bleach/chlorine	1	1	0	0	0	0	0		Inadequate water sources	1	0	0	0	0	0	0		Lack of time Lack of knowledge	0
Bunyangabu	Bunyangabu	Rwimi Subcounty	Kaina	Kaina B	334	2024-04-08	45	Munyankole	Anglican	Married	100,00 to 500,000	Man	Peasant farmer	No	No	Yes	No	No	Public water tap		Yes	More than 30 minutes	Less than 5 people	30 - 40 years	Yes (Enough)	Adult woman	Less than 10,000UGX	Yes	Yes	Boil	1	0	0	0	0	0	0		Inadequate water sources	1	0	0	0	0	0	0		Lack of fuel	1
Bunyangabu	Bunyangabu	Kibiito	Mujunju	Nyamugoro Kanyasinga	167	2024-04-06	81	Mukiiga	Anglican	Married	100,00 to 500,000	Man	Peasant farmer	No	Yes	Yes	No	No	Public water tap		Yes	More than 30 minutes	5 - 10 people	More than 40 years	Yes (but not enough)	Adult woman	Less than 10,000UGX	Yes	No										Inadequate water sources Lack of money to pay for the water	1	0	0	0	0	1	0		Lack of fuel Lack of time	1
[truncated: 49 more columns]
